# Supplementary material for: Severe COVID-19 in Vaccinated Adults With Hematologic Cancers in the Veterans Health Administration
Source: PubMed Central journal article supplement (PMC10891464; doi:10.1001/jamanetworkopen.2024.0288), 2024-02-23
Supplement: jamanetwopen-e240288-s001.pdf [file jamanetwopen-e240288-s001.pdf]

## Supplemental Online Content

Anand ST, Vo AD, La J, et al. Severe COVID-19 in vaccinated adults with hematologic malignant neoplasms in the Veterans Health Administration. *JAMA Netw Open*. 2024;7(2):e240288.

doi:10.1001/jamanetworkopen.2024.0288

**eTable 1.** Data Dictionary

**eTable 2.** Patients With Hodgkin Lymphoma: Data and Analysis

**eTable 3.** Patients With Non-Hodgkin Lymphoma: Data and Analysis

**eTable 4.** Patients With Chronic Lymphocytic Leukemia: Data and Analysis

**eTable 5.** Patients With Plasmacytoid Malignant Neoplasms: Data and Analysis

**eTable 6.** Patients With Myeloproliferative Disorders: Data and Analysis

**eTable 7.** Patients With Myelodysplastic Syndromes: Data and Analysis

**eTable 8.** Patients With Chronic Myelogenous Leukemia: Data and Analysis

**eTable 9.** Patients With Acute Myeloblastic Leukemia: Data and Analysis

**eTable 10.** Comparison Across Classes of Hematologic Malignant Neoplasm: All Patients

**eTable 11.** Comparison Across Classes of Hematologic Malignant Neoplasm: Patients With Severe COVID-19

**eAppendix.** Timing of Vaccination and Infection: Subcohorts of Patients Infected in Omicron B Period

**eTable 12.** Patients With Infection Between March 1, 2022, and September 30, 2022: Data and Analysis

**eTable 13.** Patients With Severe COVID-19, Stratified by Age and Number of Comorbidities

**eTable 14.** Patients Who Died Within 28 Days of Breakthrough Infection: Data Summary

This supplemental material has been provided by the authors to give readers additional information about their work.

**eTable 1. Data dictionary**

| Variable                                     | Definition                                                                                                                                                                                                                                                                                                                                                                                                                                                                                                 |
|----------------------------------------------|------------------------------------------------------------------------------------------------------------------------------------------------------------------------------------------------------------------------------------------------------------------------------------------------------------------------------------------------------------------------------------------------------------------------------------------------------------------------------------------------------------|
| Breakthrough infection                       | Positive SARS-CoV-2 test (PCR or antigen) at least 14 days after the second dose of mRNA vaccine or first dose of adenoviral vaccine. Only the first breakthrough infection was analyzed                                                                                                                                                                                                                                                                                                                   |
| Severe                                       | Hospitalized with either hypoxemia, mechanical ventilation or intubation, or use of dexamethasone; or death from any cause 2-28 days after the positive test                                                                                                                                                                                                                                                                                                                                               |
| Non-severe                                   | Not hospitalized, or hospitalized and not meeting criteria for severe disease                                                                                                                                                                                                                                                                                                                                                                                                                              |
| Hospitalization                              | Inpatient admission (prevalent) to an acute-care service at a VA Medical Center, or admission to a non-VA hospital contracted with the VA.                                                                                                                                                                                                                                                                                                                                                                 |
| Mechanical ventilation or intubation         | CPT codes 94002, 94003, 94004, 94005, or 31500; or ICD-10 codes Z99.1, Z99.11, Z99.12, or J95.851; or ICD-9 codes 96.7, 96.70, 96.71, 96.72, 96.0, 96.01, 96.02, 96.03, 96.04, or 96.05                                                                                                                                                                                                                                                                                                                    |
| Hypoxemia                                    | Minimum SpO2 < 94% or any use of supplemental oxygen, as determined between days -1 and +14 relative to the first positive SARS-CoV-2 test                                                                                                                                                                                                                                                                                                                                                                 |
| Dexamethasone                                | As recorded in structured data in the VA EHR during an acute-care hospitalization                                                                                                                                                                                                                                                                                                                                                                                                                          |
| Sex                                          | As recorded in structured data in the VA EHR, self-reported by patients at enrollment in VA care                                                                                                                                                                                                                                                                                                                                                                                                           |
| Age                                          | In years at time of breakthrough infection                                                                                                                                                                                                                                                                                                                                                                                                                                                                 |
| Race and Ethnicity                           | As recorded in structured data in the VA ESR, self-reported by patients at enrollment in VA care. At the time when most patients enrolled, the categories were American Indian or Alaska Native, Asian, Black or African American, Native Hawaiian or Other Pacific Islander, or White, without a category for "other" or mixed/multiple. Hispanic/Latino ethnicity is self-reported separately from race. For either race or ethnicity, "Unknown" indicates that no category was selected by the patient. |
| Vaccine Type                                 | Defined based on the type of the initial vaccination, as recorded in the VA COVID-19 Shared Data Resource. (Patients with first and second doses of different types were excluded.)                                                                                                                                                                                                                                                                                                                        |
| Janssen                                      | Patient considered vaccinated 14 days after 1 <sup>st</sup> dose                                                                                                                                                                                                                                                                                                                                                                                                                                           |
| Moderna                                      | Patient considered vaccinated 14 days after 2 <sup>nd</sup> dose                                                                                                                                                                                                                                                                                                                                                                                                                                           |
| Pfizer                                       | Patient considered vaccinated 14 days after 2 <sup>nd</sup> dose                                                                                                                                                                                                                                                                                                                                                                                                                                           |
| Boosted before breakthrough                  | The patient was considered boosted before breakthrough if the breakthrough infection occurred at least 7 days after receiving the booster shot                                                                                                                                                                                                                                                                                                                                                             |
| History of infection before vaccinated       | Previous positive SARS-CoV-2 test (PCR or antigen) no later than 14 days after the second mRNA vaccine or first adenoviral vaccine.                                                                                                                                                                                                                                                                                                                                                                        |
| Variant period                               | Date of positive test defining breakthrough infection:                                                                                                                                                                                                                                                                                                                                                                                                                                                     |
| Pre-delta                                    | Before 7/1/2021                                                                                                                                                                                                                                                                                                                                                                                                                                                                                            |
| Delta                                        | Between 7/1/2021 and 12/15/2021, inclusive                                                                                                                                                                                                                                                                                                                                                                                                                                                                 |
| Omicron A                                    | Between 12/16/2021 and 2/28/2022, inclusive                                                                                                                                                                                                                                                                                                                                                                                                                                                                |
| Omicron B                                    | Between 3/1/2022 and 9/30/2022, inclusive                                                                                                                                                                                                                                                                                                                                                                                                                                                                  |
| Antiviral treatment for SARS-CoV-2 infection | Prescription for monoclonal antibodies (bamlanivimab, etesevimab, casirivimab, imdevimab, sotrovimab, or bebtelovimab) or oral antivirals (nirmatrelvir/ritonavir or molnupiravir). Remdesivir was excluded because it used more frequently to treat than to prevent severe COVID-19.                                                                                                                                                                                                                      |
| Hematologic cancer                           | Use of ICD-10 code between 1/1/2020 and 4/5/2023:                                                                                                                                                                                                                                                                                                                                                                                                                                                          |
| Lymphocytic                                  |                                                                                                                                                                                                                                                                                                                                                                                                                                                                                                            |
| Hodgkin's Lymphoma                           | C81.*                                                                                                                                                                                                                                                                                                                                                                                                                                                                                                      |
| Non-Hodgkin's Lymphoma                       | C82.*, C83.*, C84.*, C85.*, C86.*, C88.4, C91.5*, C91.A* (includes follicular and non-follicular B-cell, T/NK-cell, MALT, and Burkitt lymphomas)                                                                                                                                                                                                                                                                                                                                                           |
| Chronic lymphocytic leukemia                 | C91.1*, C91.3*, C91.4*, C91.6* (includes hairy cell and prolymphocytic B-cell and T-cell leukemias)                                                                                                                                                                                                                                                                                                                                                                                                        |

|                                                                                             |                                                                                                                                                                                                                                                                                                                                                            |
|---------------------------------------------------------------------------------------------|------------------------------------------------------------------------------------------------------------------------------------------------------------------------------------------------------------------------------------------------------------------------------------------------------------------------------------------------------------|
| Acute lymphoblastic leukemia                                                                | C91.0*                                                                                                                                                                                                                                                                                                                                                     |
| Myeloid                                                                                     |                                                                                                                                                                                                                                                                                                                                                            |
| Myeloproliferative disorders                                                                | D45, D47.1, D47.3, D47.4, C94.4* (includes polycythemia vera, essential thrombocythemia, and myelofibrosis)                                                                                                                                                                                                                                                |
| Myelodysplastic syndromes                                                                   | C94.6, D46.0, D46.1, D46.2*, D46.9, D46.A, D46.B, D46.C, D46.Z, C92.2*, C93.1* (includes atypical CML and chronic myelomonocytic anemia, excludes D46.4 refractory anemia not otherwise specified)                                                                                                                                                         |
| Chronic myelogenous leukemia                                                                | C93.1* (code specifies BCR-ABL+)                                                                                                                                                                                                                                                                                                                           |
| Acute myelogenous leukemia                                                                  | C92.0*, C92.4*, C92.5*, C92.6*, C92.A*, C93.0* (includes acute promyelocytic, myelomonocytic, and monocytic leukemias)                                                                                                                                                                                                                                     |
| Plasma cell / plasmacytoid                                                                  | C88.0, C90.* (includes multiple myeloma and Waldenstrom's, excludes monoclonal gammopathy)                                                                                                                                                                                                                                                                 |
| Comorbidities                                                                               | These comorbidities were derived based the diagnosis and procedure codes described in the CMS Chronic Conditions Warehouse algorithms ( <a href="https://www2.ccwdata.org/web/guest/condition-categories">https://www2.ccwdata.org/web/guest/condition-categories</a> ) any time within one year before the date of completing the initial vaccine series. |
| Alzheimers disease and related disorders or senile dementia                                 |                                                                                                                                                                                                                                                                                                                                                            |
| Chronic kidney disease                                                                      |                                                                                                                                                                                                                                                                                                                                                            |
| Chronic obstructive pulmonary disease and bronchiectasis                                    |                                                                                                                                                                                                                                                                                                                                                            |
| Diabetes                                                                                    |                                                                                                                                                                                                                                                                                                                                                            |
| Heart failure                                                                               |                                                                                                                                                                                                                                                                                                                                                            |
| Mobility impairments                                                                        |                                                                                                                                                                                                                                                                                                                                                            |
| Liver disease / cirrhosis and other                                                         |                                                                                                                                                                                                                                                                                                                                                            |
| Multiple sclerosis and transverse myelitis                                                  |                                                                                                                                                                                                                                                                                                                                                            |
| Peripheral vascular disease                                                                 |                                                                                                                                                                                                                                                                                                                                                            |
| Pressure and chronic ulcers                                                                 |                                                                                                                                                                                                                                                                                                                                                            |
| Schizophrenia and other psychotic disorders                                                 |                                                                                                                                                                                                                                                                                                                                                            |
| Comorbidity score (0-6)                                                                     |                                                                                                                                                                                                                                                                                                                                                            |
| Treatment for hematologic cancer or with immune-suppressive drugs including glucocorticoids | Order/dispensation of one of the drugs listed below within 3-12 months (12 months for lymphocyte-depleting, 6 months for cytotoxic chemotherapy, 3 months for all others) before date of breakthrough infection.                                                                                                                                           |
| Glucocorticoids                                                                             | Methylprednisolone, prednisone (dexamethasone was excluded from the list because it is also used to treat severe COVID-19; hydrocortisone and budesonide were excluded due to frequent topical or inhaled use; other glucocorticoids that were also excluded are exclusively topical, inhaled, or injected locally)                                        |
| BTK inhibitor                                                                               | Acalabrutinib, ibrutinib, zanubrutinib                                                                                                                                                                                                                                                                                                                     |
| Venetoclax                                                                                  | Venetoclax                                                                                                                                                                                                                                                                                                                                                 |
| "-lidomide"                                                                                 | Lenalidomide, pomalidomide, thalidomide                                                                                                                                                                                                                                                                                                                    |
| Proteasome inhibitor                                                                        | Bortezomib, carfilzomib, ixazomib                                                                                                                                                                                                                                                                                                                          |
| Belinostat                                                                                  | Belinostat                                                                                                                                                                                                                                                                                                                                                 |
| MAB for myeloma                                                                             | Daratumumab, elotuzumab, isatuximab                                                                                                                                                                                                                                                                                                                        |
| Hydroxyurea                                                                                 | Hydroxyurea                                                                                                                                                                                                                                                                                                                                                |
| Methotrexate                                                                                | Methotrexate                                                                                                                                                                                                                                                                                                                                               |
| JAK2 inhibitor                                                                              | Fedratinib, pacritinib, ruxolitinib                                                                                                                                                                                                                                                                                                                        |

|                        |                                                                                                                                                                                                                                                                                                                                                                                                                                                                                                                                                                                                                                                                                                                                                                                                                                                                          |
|------------------------|--------------------------------------------------------------------------------------------------------------------------------------------------------------------------------------------------------------------------------------------------------------------------------------------------------------------------------------------------------------------------------------------------------------------------------------------------------------------------------------------------------------------------------------------------------------------------------------------------------------------------------------------------------------------------------------------------------------------------------------------------------------------------------------------------------------------------------------------------------------------------|
| BCR-ABL inhibitor      | Bosutinib, dasatinib, imatinib, nilotinib                                                                                                                                                                                                                                                                                                                                                                                                                                                                                                                                                                                                                                                                                                                                                                                                                                |
| Lymphocyte-depleting   | Alemtuzumab, obinutuzumab, ocrelizumab, rituximab                                                                                                                                                                                                                                                                                                                                                                                                                                                                                                                                                                                                                                                                                                                                                                                                                        |
| Cytotoxic chemotherapy | Arsenic, asparaginase, asparaginase erwinia chrysanthemi, azacytidine, bendamustine, bleomycin, busulfan, cabazitaxel, calaspargase, capecitabine, carboplatin, carmustine, cedazuridine, chlorambucil, cisplatin, cladribine, clofarabine, cyclophosphamide, cytarabine, dacarbazine, dactinomycin, daunorubicin, decitabine, docetaxel, doxorubicin, epirubicin, eribulin, etoposide, fludarabine, gemcitabine, hydroxycamptothecin, hydroxyurea, idarubicin, ifosfamide, irinotecan, ixabepilone, lomustine, mechlorethamine, melphalan, mitomycin c, mitoxantrone, nelarabine, oxaliplatin, paclitaxel, pegaspargase, pemetrexed, pralatrexate, procarbazine, temozolomide, thioguanine, thiotepa, topotecan, trabectedine, trifluridine, valrubicin, vinblastine, vincristine, vindesine, vinorelbine (fluorouracil was excluded because it is also used topically) |
| IS non-hematologic     | Abatacept, adalimumab, anakinra, azathioprine, belimumab, benralizumab, brodalumab, canakinumab, certolizumab, dimethyl fumarate, dupilumab, etanercept, fingolimod, golimumab, infliximab, ixekizumab, leflunomide, mepolizumab, mercaptopurine, mycophenolate, mycophenolic, natalizumab, rapamycin, rilonacept, sarilumab, secukinumab, sirolimus, teriflunomide, tofacitinib, upadacitinib, ustekinumab, vedolizumab (cyclosporine and tacrolimus were excluded from the list because they are also used topically; patients who received baricitinib or tocilizumab were identified but then excluded due to probable use to treat severe COVID-19 rather than as chronic immune-suppressive treatment, and very low likelihood of being used as part of cancer treatment)                                                                                          |

**eTable 2.** Clinical and demographic data for patients with Hodgkin’s lymphoma and SARS-CoV-2 infection after vaccination, stratified by severity, and results of multivariable logistic regression analyses with severe versus non-severe infection as the outcome. Percentages of patients with severe disease are not calculated for N < 10 for a given variable.

| N = 157                                      | Severity             |                 |                  | Multivariable model     |
|----------------------------------------------|----------------------|-----------------|------------------|-------------------------|
|                                              | Non-severe (N = 138) | Severe (N = 19) | % Severe (12.1%) | aOR (CI), P             |
| <b>Medications</b>                           |                      |                 |                  |                         |
| Glucocorticoids                              | 82 (59.4%)           | 8 (42.1%)       | 8.9%             |                         |
| Methotrexate                                 | 3 (2.2%)             | 0 (0.0%)        |                  |                         |
| Lymphocyte-depleting                         | 8 (5.8%)             | 2 (10.5%)       | 20.0%            |                         |
| Cytotoxic chemotherapy                       | 26 (18.8%)           | 4 (21.1%)       | 13.3%            |                         |
| IS non-hematologic                           | 8 (5.8%)             | 1 (5.3%)        |                  |                         |
| <b>Treatment group</b>                       |                      |                 |                  |                         |
| Combination that includes both GC and non-GC | 30 (21.7%)           | 4 (21.1%)       | 11.8%            | 0.65 (0.15-2.88), 0.60  |
| Glucocorticoids only                         | 52 (37.7%)           | 4 (21.1%)       | 7.1%             | 0.29 (0.07-1.18), 0.04  |
| Non-glucocorticoids only                     | 7 (5.1%)             | 2 (10.5%)       |                  | 3.03 (0.46-19.84), 0.08 |
| No medication                                | 49 (35.5%)           | 9 (47.4%)       | 15.6%            | Referent                |
| <b>Age</b>                                   |                      |                 |                  |                         |
| Mean (SD), aOR per year                      | 61.13 (13.09)        | 63.29 (12.49)   |                  | 1.01 (0.97-1.06), 0.62  |
| <b>Gender</b>                                |                      |                 |                  |                         |
| F                                            | 17 (12.3%)           | 2 (10.5%)       | 10.5%            | 1.28 (0.23-7.09), 0.78  |
| M                                            | 121 (87.7%)          | 17 (89.5%)      | 12.3%            | Referent                |
| <b>Period of dominant variant</b>            |                      |                 |                  |                         |
| Delta                                        | 23 (16.7%)           | 4 (21.1%)       | 14.8%            | 0.27 (0.02-4.01), 0.50  |
| Omicron A                                    | 65 (47.1%)           | 8 (42.1%)       | 11.0%            | 0.28 (0.02-3.58), 0.45  |
| Omicron B                                    | 47 (34.1%)           | 6 (31.6%)       | 11.3%            | 0.32 (0.02-4.76), 0.72  |
| Pre-delta                                    | 3 (2.2%)             | 1 (5.3%)        |                  | Referent                |
| <b>Vaccine Type</b>                          |                      |                 |                  |                         |
| Janssen                                      | 7 (5.1%)             | 3 (15.8%)       | 30.0%            |                         |
| Moderna                                      | 60 (43.5%)           | 11 (57.9%)      | 15.5%            |                         |
| Pfizer                                       | 71 (51.5%)           | 5 (26.3%)       | 6.6%             |                         |
| <b>Immunity-related</b>                      |                      |                 |                  |                         |
| Boosted                                      | 64 (46.4%)           | 5 (26.3%)       | 7.2%             | 0.30 (0.08-1.08), 0.07  |

| N = 157                          | Severity                |                    | % Severe<br>(12.1%) | Multivariable model    |
|----------------------------------|-------------------------|--------------------|---------------------|------------------------|
|                                  | Non-severe<br>(N = 138) | Severe<br>(N = 19) |                     | aOR (CI), P            |
| No booster                       | 74 (53.6%)              | 14 (73.7%)         | 15.9%               | Referent               |
| Infection before vaccinated      | 5 (3.6%)                | 1 (5.3%)           |                     |                        |
| <b>Comorbidities</b>             |                         |                    |                     |                        |
| Alzheimer's / dementia           | 1 (0.7%)                | 3 (15.8%)          |                     |                        |
| Chronic kidney disease           | 25 (18.1%)              | 7 (36.8%)          | 21.9%               |                        |
| COPD / bronchiectasis            | 14 (10.1%)              | 2 (10.5%)          | 12.5%               |                        |
| Diabetes                         | 37 (26.8%)              | 7 (36.8%)          | 15.9%               |                        |
| Heart failure                    | 14 (10.1%)              | 4 (21.1%)          | 22.2%               |                        |
| Mobility impairments             | 4 (2.9%)                | 1 (5.3%)           |                     |                        |
| MS / transverse myelitis         | 2 (1.5%)                | 1 (5.3%)           |                     |                        |
| Peripheral vascular disease      | 3 (2.2%)                | 0 (0.0%)           |                     |                        |
| Pressure / chronic ulcers        | 2 (1.5%)                | 1 (5.3%)           |                     |                        |
| Schizophrenia / psychosis        | 3 (2.2%)                | 0 (0.0%)           |                     |                        |
| <b>Comorbidity Score (0 – 6)</b> |                         |                    |                     |                        |
| Mean (SD), per point             | 0.68 (1.01)             | 1.21 (1.18)        |                     | 1.78 (1.13-2.82), 0.01 |
| <b>Treatment for SARS-CoV-2</b>  |                         |                    |                     |                        |
| Oral antiviral                   | 14 (10.1%)              | 0 (0.0%)           | 0.0%                | ND                     |
| Nirmatrelvir / ritonavir         | 10 (7.3%)               | 0 (0.0%)           | 0.0%                |                        |
| Molnupiravir                     | 4 (2.9%)                | 0 (0.0%)           |                     |                        |
| MAB                              | 14 (10.1%)              | 2 (10.5%)          | 12.5%               | 1.10 (0.18-6.69), 0.92 |
| No antiviral                     | 111 (80.4%)             | 17 (89.5%)         | 13.3%               | Referent               |

aOR = adjusted odds ratio. CI = 95% confidence interval. MAB = monoclonal antibodies. IS = immune-suppressive medication. GC = glucocorticoid. COPD = chronic obstructive pulmonary disease. MS = multiple sclerosis.

**eTable 3.** Clinical and demographic data for patients with non-Hodgkin’s lymphoma and SARS-CoV-2 infection after vaccination, stratified by severity, and results of multivariable logistic regression analyses with severe versus non-severe infection as the outcome. Percentages of patients with severe disease are not calculated for N < 10 for a given variable.

| N = 1731                                     | Severity              |                  |                  | Multivariable model      |
|----------------------------------------------|-----------------------|------------------|------------------|--------------------------|
|                                              | Non-severe (N = 1370) | Severe (N = 361) | % Severe (20.9%) | aOR (CI), P              |
| <b>Medications</b>                           |                       |                  |                  |                          |
| Glucocorticoids                              | 880 (64.2%)           | 266 (73.7%)      | 23.2%            |                          |
| BTK inhibitor                                | 25 (1.8%)             | 7 (1.9%)         | 21.9%            |                          |
| Venetoclax                                   | 3 (0.2%)              | 2 (0.6%)         |                  |                          |
| “-lidomide”                                  | 28 (2.0%)             | 14 (3.9%)        | 33.3%            |                          |
| Proteasome inhibitor                         | 2 (0.2%)              | 1 (0.3%)         |                  |                          |
| Belinostat                                   | 1 (0.1%)              | 0 (0.0%)         |                  |                          |
| MAB myeloma                                  | 2 (0.2%)              | 0 (0.0%)         |                  |                          |
| Hydroxyurea                                  | 1 (0.1%)              | 2 (0.6%)         |                  |                          |
| Methotrexate                                 | 90 (6.6%)             | 33 (9.1%)        | 26.8%            |                          |
| BCR-ABL inhibitor                            | 2 (0.2%)              | 0 (0.0%)         |                  |                          |
| Lymphocyte-depleting                         | 374 (27.3%)           | 142 (39.3%)      | 27.5%            |                          |
| Cytotoxic chemotherapy                       | 373 (27.2%)           | 143 (39.6%)      | 27.7%            |                          |
| IS non-hematologic                           | 61 (4.5%)             | 18 (5.0%)        | 22.8%            |                          |
| <b>Treatment group</b>                       |                       |                  |                  |                          |
| Combination that includes both GC and non-GC | 444 (32.4%)           | 160 (44.3%)      | 26.5%            | 2.58 (1.83-3.64), <0.001 |
| Glucocorticoids only                         | 436 (31.8%)           | 106 (29.4%)      | 19.6%            | 1.47 (1.03-2.12), 0.14   |
| Non-glucocorticoids only                     | 98 (7.2%)             | 33 (9.1%)        | 25.2%            | 2.40 (1.45-3.97), 0.06   |
| No medication                                | 392 (28.6%)           | 62 (17.2%)       | 13.7%            | Referent                 |
| <b>Age</b>                                   |                       |                  |                  |                          |
| Mean (SD), aOR per year                      | 70.02 (11.66)         | 75.02 (9.77)     |                  | 1.04 (1.03-1.06), <0.001 |
| <b>Sex</b>                                   |                       |                  |                  |                          |
| F                                            | 74 (5.4%)             | 14 (3.9%)        | 15.9%            | 1.32 (0.71-2.46), 0.39   |
| M                                            | 1296 (94.6%)          | 347 (96.1%)      | 25.8%            | Referent                 |
| <b>Period of dominant variant</b>            |                       |                  |                  |                          |
| Delta                                        | 224 (16.4%)           | 78 (21.6%)       | 25.8%            | 0.95 (0.48-1.90), 0.66   |
| Omicron A                                    | 539 (39.3%)           | 126 (34.9%)      | 18.9%            | 0.73 (0.37-1.45), 0.11   |

| N = 1731                         | Severity                 |                     | % Severe<br>(20.9%) | Multivariable model      |
|----------------------------------|--------------------------|---------------------|---------------------|--------------------------|
|                                  | Non-severe<br>(N = 1370) | Severe<br>(N = 361) |                     | aOR (CI), P              |
| Omicron B                        | 574 (41.9%)              | 141 (39.1%)         | 19.7%               | 0.90 (0.45-1.82), 0.90   |
| Pre-delta                        | 33 (2.4%)                | 16 (4.4%)           | 32.7%               | Referent                 |
| <b>Vaccine Type</b>              |                          |                     |                     |                          |
| Janssen                          | 64 (4.7%)                | 15 (4.2%)           | 19.0%               |                          |
| Moderna                          | 644 (47.0%)              | 158 (43.8%)         | 19.7%               |                          |
| Pfizer                           | 662 (48.3%)              | 188 (52.1%)         | 22.1%               |                          |
| <b>Immunity-related</b>          |                          |                     |                     |                          |
| Boosted                          | 842 (61.5%)              | 198 (54.9%)         | 19.0%               | 0.77 (0.57-1.04), 0.09   |
| No booster                       | 528 (38.5%)              | 163 (45.1%)         | 23.6%               | Referent                 |
| Infection before vaccinated      | 53 (3.9%)                | 12 (3.3%)           | 18.5%               |                          |
| <b>Comorbidities</b>             |                          |                     |                     |                          |
| Alzheimer's / dementia           | 56 (4.1%)                | 39 (10.8%)          | 41.1%               |                          |
| Chronic kidney disease           | 322 (23.5%)              | 134 (37.1%)         | 29.4%               |                          |
| COPD / bronchiectasis            | 213 (15.6%)              | 112 (31.0%)         | 34.5%               |                          |
| Diabetes                         | 511 (37.3%)              | 175 (48.5%)         | 25.5%               |                          |
| Heart failure                    | 123 (9.0%)               | 83 (23.0%)          | 40.3%               |                          |
| Mobility impairments             | 14 (1.0%)                | 10 (2.8%)           | 41.7%               |                          |
| MS / transverse myelitis         | 3 (0.2%)                 | 0 (0.0%)            |                     |                          |
| Peripheral vascular disease      | 87 (6.4%)                | 46 (12.7%)          | 34.6%               |                          |
| Pressure / chronic ulcers        | 30 (2.2%)                | 24 (6.7%)           | 44.4%               |                          |
| Schizophrenia / psychosis        | 29 (2.1%)                | 7 (1.9%)            | 19.4%               |                          |
| <b>Comorbidity Score (0 – 6)</b> |                          |                     |                     |                          |
| Mean (SD), aOR per point         | 0.96 (1.08)              | 1.63 (1.37)         |                     | 1.42 (1.29-1.57), <0.001 |
| <b>Treatment for SARS-CoV-2</b>  |                          |                     |                     |                          |
| Oral antiviral                   | 199 (14.5%)              | 10 (2.8%)           | 4.8%                | 0.17 (0.08-0.32), <0.001 |
| Nirmatrelvir / ritonavir         | 154 (11.2%)              | 7 (1.9%)            | 4.3%                |                          |
| Molnupiravir                     | 45 (3.3%)                | 3 (0.8%)            | 6.3%                |                          |
| MAB                              | 145 (10.6%)              | 28 (7.8%)           | 16.2%               | 0.50 (0.32-0.78), 0.003  |
| No antiviral                     | 1036 (75.6%)             | 323 (89.5%)         | 23.8%               | Referent                 |

aOR = adjusted odds ratio. CI = 95% confidence interval. BTK = Bruton tyrosine kinase. “-lidomide” = thalidomide, lenalidomide, pomalidomide. MAB = monoclonal antibodies. IS = immune-suppressive medication. GC = glucocorticoid. COPD = chronic obstructive pulmonary disease. MS = multiple sclerosis.



**eTable 4.** Clinical and demographic data for patients with chronic lymphocytic leukemia and SARS-CoV-2 infection after vaccination, stratified by severity, and results of multivariable logistic regression analyses with severe versus non-severe infection as the outcome. Percentages of patients with severe disease are not calculated for N < 10 for a given variable.

| N = 1206                                            | Severity                |                     | % Severe<br>(22.8%) | Multivariable model      |
|-----------------------------------------------------|-------------------------|---------------------|---------------------|--------------------------|
|                                                     | Non-severe<br>(N = 931) | Severe<br>(N = 275) |                     | aOR (CI), P              |
| <b>Medications</b>                                  |                         |                     |                     |                          |
| Glucocorticoids                                     | 477 (51.2%)             | 187 (68.0%)         | 28.2%               |                          |
| BTK inhibitor                                       | 238 (25.6%)             | 100 (36.4%)         | 29.6%               |                          |
| Venetoclax                                          | 71 (7.6%)               | 20 (7.3%)           | 22.0%               |                          |
| “lidomide”                                          | 0 (0.0%)                | 2 (0.7%)            |                     |                          |
| MAB for myeloma                                     | 1 (0.1%)                | 0 (0.0%)            |                     |                          |
| Hydroxyurea                                         | 1 (0.1%)                | 2 (0.7%)            |                     |                          |
| Methotrexate                                        | 22 (2.4%)               | 15 (5.5%)           | 40.5%               |                          |
| JAK2 inhibitor                                      | 1 (0.1%)                | 0 (0.0%)            |                     |                          |
| BCR-ABL inhibitor                                   | 1 (0.1%)                | 0 (0.0%)            |                     |                          |
| Lymphocyte-depleting                                | 134 (14.4%)             | 52 (18.9%)          | 28.0%               |                          |
| Cytotoxic chemotherapy                              | 107 (11.5%)             | 42 (15.3%)          | 28.2%               |                          |
| IS non-hematologic                                  | 13 (1.4%)               | 7 (2.6%)            | 35.0%               |                          |
| <b>Treatment group</b>                              |                         |                     |                     |                          |
| Any medication including glucocorticoid combination | 225 (24.2%)             | 117 (42.6%)         | 34.2%               | 3.91 (2.62-5.84), <0.001 |
| Glucocorticoids only                                | 252 (27.1%)             | 70 (25.5%)          | 21.7%               | 1.86 (1.22-2.83), 0.91   |
| Non-glucocorticoids only                            | 144 (15.5%)             | 34 (12.4%)          | 19.1%               | 1.54 (0.94-2.54), 0.30   |
| No medication                                       | 310 (33.3%)             | 54 (19.6%)          | 14.8%               | Referent                 |
| <b>Age</b>                                          |                         |                     |                     |                          |
| Mean (SD), aOR per year                             | 73.35 (8.96)            | 77.32 (9.06)        |                     | 1.06 (1.04-1.08), <0.001 |
| <b>Sex</b>                                          |                         |                     |                     |                          |
| F                                                   | 16 (1.7%)               | 8 (2.9%)            | 33.3%               | 3.44 (1.24-9.51), 0.02   |
| M                                                   | 915 (98.3%)             | 267 (97.1%)         | 22.6%               | Referent                 |
| <b>Period of dominant variant</b>                   |                         |                     |                     |                          |
| Delta                                               | 162 (17.4%)             | 63 (22.9%)          | 28.0%               | 1.37 (0.60-3.12), 0.17   |
| Omicron A                                           | 366 (39.3%)             | 107 (38.9%)         | 22.6%               | 1.07 (0.47-2.43), 0.90   |
| Omicron B                                           | 378 (40.6%)             | 94 (34.2%)          | 19.9%               | 0.96 (0.41-2.21), 0.42   |

| N = 1206                         | Severity                |                     | % Severe<br>(22.8%) | Multivariable model      |
|----------------------------------|-------------------------|---------------------|---------------------|--------------------------|
|                                  | Non-severe<br>(N = 931) | Severe<br>(N = 275) |                     | aOR (CI), P              |
| Pre-delta                        | 25 (2.7%)               | 11 (4.0%)           | 30.6%               | Referent                 |
| <b>Vaccine Type</b>              |                         |                     |                     |                          |
| Janssen                          | 40 (4.3%)               | 12 (4.4%)           | 23.1%               |                          |
| Moderna                          | 451 (48.4%)             | 116 (42.2%)         | 20.5%               |                          |
| Pfizer                           | 440 (47.3%)             | 147 (53.5%)         | 25.0%               |                          |
| <b>Immunity-related</b>          |                         |                     |                     |                          |
| Boosted                          | 587 (63.1%)             | 153 (55.6%)         | 20.7%               | 0.84 (0.60-1.19), 0.34   |
| No booster                       | 344 (36.9%)             | 122 (44.4%)         | 26.2%               | Referent                 |
| Infection before vaccinated      | 37 (4.0%)               | 5 (1.8%)            | 11.9%               |                          |
| <b>Comorbidities</b>             |                         |                     |                     |                          |
| Alzheimer's / dementia           | 47 (5.1%)               | 34 (12.4%)          | 42.0%               |                          |
| Chronic kidney disease           | 240 (25.8%)             | 90 (32.7%)          | 27.2%               |                          |
| COPD / bronchiectasis            | 139 (14.9%)             | 63 (22.9%)          | 31.2%               |                          |
| Diabetes                         | 340 (36.5%)             | 115 (41.8%)         | 25.3%               |                          |
| Heart failure                    | 79 (8.5%)               | 47 (17.1%)          | 37.3%               |                          |
| Mobility impairments             | 8 (0.9%)                | 4 (1.5%)            | 33.3%               |                          |
| MS / transverse myelitis         | 6 (0.6%)                | 1 (0.4%)            |                     |                          |
| Peripheral vascular disease      | 57 (6.1%)               | 39 (14.2%)          | 40.6%               |                          |
| Pressure / chronic ulcers        | 26 (2.8%)               | 14 (5.1%)           | 35.0%               |                          |
| Schizophrenia / psychosis        | 18 (1.9%)               | 5 (1.8%)            | 21.7%               |                          |
| <b>Comorbidity Score (0 – 6)</b> |                         |                     |                     |                          |
| Mean (SD), aOR per point         | 0.97 (1.08)             | 1.41 (1.35)         |                     | 1.29 (1.14-1.45), <0.001 |
| <b>Treatment for SARS-CoV-2</b>  |                         |                     |                     |                          |
| Oral antiviral                   | 150 (16.1%)             | 4 (1.5%)            | 2.6%                | 0.08 (0.03-0.22), <0.001 |
| Nirmatrelvir / ritonavir         | 99 (10.6%)              | 3 (1.1%)            | 2.9%                |                          |
| Molnupiravir                     | 51 (5.5%)               | 1 (0.4%)            | 1.9%                |                          |
| MAB                              | 140 (15.0%)             | 23 (8.4%)           | 14.1%               | 0.35 (0.21-0.58), <0.001 |
| No antiviral                     | 653 (70.1%)             | 249 (90.6%)         | 27.6%               | Referent                 |

aOR = adjusted odds ratio. CI = 95% confidence interval. BTK = Bruton tyrosine kinase. “-lidomide” = thalidomide, lenalidomide, pomalidomide. MAB = monoclonal antibodies. IS = immune-suppressive medication. GC = glucocorticoid. COPD = chronic obstructive pulmonary disease. MS = multiple sclerosis.

**eTable 5.** Clinical and demographic data for patients with plasmacytoid malignancies (myeloma or Waldenstrom’s) and SARS-CoV-2 infection after vaccination, stratified by severity, and results of multivariable logistic regression analyses with severe versus non-severe infection as the outcome. Percentages of patients with severe disease are not calculated for N < 10 for a given variable.

| N = 1014                                     | Severity             |                  | % Severe (23.1%) | Multivariable model      |
|----------------------------------------------|----------------------|------------------|------------------|--------------------------|
|                                              | Non-severe (N = 780) | Severe (N = 234) |                  | aOR (CI), P              |
| <b>Medications</b>                           |                      |                  |                  |                          |
| Glucocorticoids                              | 447 (57.3%)          | 147 (62.8%)      | 24.7%            |                          |
| BTK inhibitor                                | 32 (4.1%)            | 13 (5.6%)        | 28.9%            |                          |
| Venetoclax                                   | 5 (0.6%)             | 3 (1.3%)         |                  |                          |
| “lidomide”                                   | 354 (45.4%)          | 130 (55.6%)      | 26.9%            |                          |
| Proteasome inhibitor                         | 284 (36.4%)          | 125 (53.4%)      | 30.6%            |                          |
| MAB myeloma                                  | 139 (17.8%)          | 66 (28.2%)       | 32.2%            |                          |
| Methotrexate                                 | 20 (2.6%)            | 2 (0.9%)         | 9.1%             |                          |
| BCR-ABL inhibitor                            | 0 (0.0%)             | 1 (0.4%)         |                  |                          |
| Lymphocyte-depleting                         | 57 (7.3%)            | 19 (8.1%)        | 25.0%            |                          |
| Cytotoxic chemotherapy                       | 175 (22.4%)          | 63 (26.9%)       | 26.5%            |                          |
| IS non-hematologic                           | 28 (3.6%)            | 11 (4.7%)        | 28.2%            |                          |
| <b>Treatment group</b>                       |                      |                  |                  |                          |
| Combination that includes both GC and non-GC | 315 (40.4%)          | 119 (50.9%)      | 27.4%            | 3.06 (1.84-5.09), <0.001 |
| Glucocorticoids only                         | 132 (16.9%)          | 28 (12.0%)       | 17.5%            | 1.20 (0.65-2.25), 0.04   |
| Non-glucocorticoids only                     | 178 (22.8%)          | 60 (25.6%)       | 25.2%            | 2.66 (1.54-4.60), 0.007  |
| No medication                                | 155 (19.9%)          | 27 (11.5%)       | 14.8%            | Referent                 |
| <b>Age</b>                                   |                      |                  |                  |                          |
| Mean (SD), aOR per year                      | 71.77 (9.41)         | 74.50 (9.33)     |                  | 1.03 (1.01-1.05), <0.001 |
| <b>Sex</b>                                   |                      |                  |                  |                          |
| F                                            | 29 (3.7%)            | 4 (1.7%)         | 12.1%            | 0.87 (0.28-2.74), 0.81   |
| M                                            | 751 (96.3%)          | 230 (98.3%)      | 23.4%            | Referent                 |
| <b>Period of dominant variant</b>            |                      |                  |                  |                          |
| Delta                                        | 104 (13.3%)          | 80 (34.2%)       | 43.5%            | 3.26 (1.26-8.48), <0.001 |
| Omicron A                                    | 321 (41.2%)          | 75 (32.1%)       | 18.9%            | 1.00 (0.38-2.63), 0.08   |
| Omicron B                                    | 336 (43.1%)          | 71 (30.3%)       | 17.4%            | 1.02 (0.38-2.76), 0.14   |
| Pre-delta                                    | 19 (2.4%)            | 8 (3.4%)         | 29.6%            | Referent                 |

| N = 1014                         | Severity                |                     |                     | Multivariable model      |
|----------------------------------|-------------------------|---------------------|---------------------|--------------------------|
|                                  | Non-severe<br>(N = 780) | Severe<br>(N = 234) | % Severe<br>(23.1%) | aOR (CI), P              |
| <b>Vaccine Type</b>              |                         |                     |                     |                          |
| Janssen                          | 27 (3.5%)               | 11 (4.7%)           | 28.9%               |                          |
| Moderna                          | 348 (44.6%)             | 92 (39.3%)          | 20.9%               |                          |
| Pfizer                           | 405 (51.9%)             | 131 (56.0%)         | 24.4%               |                          |
| <b>Immunity-related</b>          |                         |                     |                     |                          |
| Boosted                          | 512 (65.6%)             | 113 (48.3%)         | 18.1%               | 0.67 (0.45-1.01), 0.05   |
| No booster                       | 268 (34.4%)             | 121 (51.7%)         | 31.1%               | Referent                 |
| Infection before vaccinated      | 35 (4.5%)               | 7 (3.0%)            | 16.7%               |                          |
| <b>Comorbidities</b>             |                         |                     |                     |                          |
| Alzheimer's / dementia           | 47 (6.0%)               | 24 (10.3%)          | 33.8%               |                          |
| Chronic kidney disease           | 277 (35.5%)             | 124 (53.0%)         | 30.9%               |                          |
| COPD / bronchiectasis            | 113 (14.5%)             | 57 (24.4%)          | 33.5%               |                          |
| Diabetes                         | 299 (38.3%)             | 129 (55.1%)         | 30.1%               |                          |
| Heart failure                    | 100 (12.8%)             | 56 (23.9%)          | 35.9%               |                          |
| Mobility impairments             | 11 (1.4%)               | 9 (3.9%)            | 45.0%               |                          |
| MS / transverse myelitis         | 5 (0.6%)                | 1 (0.4%)            |                     |                          |
| Peripheral vascular disease      | 56 (7.2%)               | 38 (16.2%)          | 40.4%               |                          |
| Pressure / chronic ulcers        | 28 (3.6%)               | 19 (8.1%)           | 40.4%               |                          |
| Schizophrenia / psychosis        | 18 (2.3%)               | 9 (3.9%)            | 33.3%               |                          |
| <b>Comorbidity Score (0 – 6)</b> |                         |                     |                     |                          |
| Mean (SD), aOR per point         | 1.14 (1.14)             | 1.83 (1.33)         |                     | 1.47 (1.29-1.67), <0.001 |
| <b>Treatment for SARS-CoV-2</b>  |                         |                     |                     |                          |
| Oral antiviral                   | 94 (12.1%)              | 6 (2.6%)            | 6.0%                | 0.24 (0.10-0.58), 0.001  |
| Nirmatrelvir / ritonavir         | 65 (8.3%)               | 3 (1.3%)            | 4.4%                |                          |
| Molnupiravir                     | 29 (3.7%)               | 3 (1.3%)            | 9.4%                |                          |
| MAB                              | 97 (12.4%)              | 15 (6.4%)           | 13.4%               | 0.27 (0.14-0.50), <0.001 |
| No antiviral                     | 592 (75.9%)             | 215 (91.9%)         | 26.6%               | Referent                 |

aOR = adjusted odds ratio. CI = 95% confidence interval. BTK = Bruton tyrosine kinase. “-lidomide” = thalidomide, lenalidomide, pomalidomide. MAB = monoclonal antibodies. IS = immune-suppressive medication. GC = glucocorticoid. COPD = chronic obstructive pulmonary disease. MS = multiple sclerosis.

**eTable 6.** Clinical and demographic data for patients with myeloproliferative disorders (not meeting criteria for myelodysplastic syndromes or chronic myelogenous leukemia) and SARS-CoV-2 infection after vaccination, stratified by severity, and results of multivariable logistic regression analyses with severe versus non-severe infection as the outcome. Percentages of patients with severe disease are not calculated for N < 10 for a given variable.

| N = 1144                                     | Severity             |                  | % Severe (17.0%) | Multivariable model      |
|----------------------------------------------|----------------------|------------------|------------------|--------------------------|
|                                              | Non-severe (N = 949) | Severe (N = 195) |                  | aOR (CI), P              |
| <b>Medications</b>                           |                      |                  |                  |                          |
| Glucocorticoids                              | 516 (54.4%)          | 128 (65.6%)      | 19.9%            |                          |
| “-lidomide”                                  | 3 (0.3%)             | 1 (0.5%)         |                  |                          |
| Hydroxyurea                                  | 220 (23.2%)          | 33 (16.9%)       | 13.0%            |                          |
| Methotrexate                                 | 18 (1.9%)            | 2 (1.0%)         | 10.0%            |                          |
| JAK2 inhibitor                               | 30 (3.2%)            | 8 (4.1%)         | 21.1%            |                          |
| BCR-ABL inhibitor                            | 2 (0.2%)             | 0 (0.0%)         |                  |                          |
| Lymphocyte-depleting                         | 10 (1.1%)            | 4 (2.1%)         | 28.6%            |                          |
| Cytotoxic chemotherapy                       | 35 (3.7%)            | 17 (8.7%)        | 32.7%            |                          |
| IS non-hematologic                           | 52 (5.5%)            | 14 (7.2%)        | 21.2%            |                          |
| <b>Treatment group</b>                       |                      |                  |                  |                          |
| Combination that includes both GC and non-GC | 180 (19.0%)          | 47 (24.1%)       | 20.7%            | 1.40 (0.86-2.28), 0.10   |
| Glucocorticoids only                         | 336 (35.4%)          | 81 (41.5%)       | 19.4%            | 1.38 (0.90-2.12), 0.07   |
| Non-glucocorticoids only                     | 135 (14.2%)          | 19 (9.7%)        | 12.3%            | 0.69 (0.37-1.27), 0.03   |
| No medication                                | 298 (31.4%)          | 48 (24.6%)       | 13.9%            | Referent                 |
| <b>Age</b>                                   |                      |                  |                  |                          |
| Mean (SD), aOR per year                      | 63.68 (13.90)        | 72.09 (11.76)    |                  | 1.05 (1.03-1.07), <0.001 |
| <b>Sex</b>                                   |                      |                  |                  |                          |
| F                                            | 102 (10.8%)          | 9 (4.6%)         | 8.1%             | 0.71 (0.34-1.51), 0.37   |
| M                                            | 847 (89.3%)          | 186 (95.4%)      | 18.0%            | Referent                 |
| <b>Period of dominant variant</b>            |                      |                  |                  |                          |
| Delta                                        | 146 (15.4%)          | 49 (25.1%)       | 25.1%            | 3.83 (1.20-12.28), 0.005 |
| Omicron A                                    | 382 (40.3%)          | 61 (31.3%)       | 13.8%            | 1.83 (0.58-5.80), 0.47   |
| Omicron B                                    | 393 (41.4%)          | 81 (41.5%)       | 17.1%            | 2.76 (0.86-8.87), 0.17   |
| Pre-delta                                    | 28 (3.0%)            | 4 (2.1%)         | 12.5%            | Referent                 |
| <b>Vaccine Type</b>                          |                      |                  |                  |                          |

| N = 1144                        | Severity                |                     |                     | Multivariable model      |
|---------------------------------|-------------------------|---------------------|---------------------|--------------------------|
|                                 | Non-severe<br>(N = 949) | Severe<br>(N = 195) | % Severe<br>(17.0%) | aOR (CI), P              |
| Janssen                         | 90 (9.5%)               | 18 (9.2%)           | 16.7%               |                          |
| Moderna                         | 435 (45.8%)             | 80 (41.0%)          | 15.5%               |                          |
| Pfizer                          | 424 (44.7%)             | 97 (49.7%)          | 23.0%               |                          |
| <b>Immunity-related</b>         |                         |                     |                     |                          |
| Boosted                         | 436 (45.9%)             | 78 (40.0%)          | 15.2%               | 0.63 (0.42-0.95), 0.03   |
| No booster                      | 513 (54.1%)             | 117 (60.0%)         | 18.6%               | Referent                 |
| Infection before vaccinated     | 62 (6.5%)               | 8 (4.1%)            | 11.4%               |                          |
| <b>Comorbidities</b>            |                         |                     |                     |                          |
| Alzheimer's / dementia          | 54 (5.7%)               | 41 (21.0%)          | 43.2%               |                          |
| Chronic kidney disease          | 246 (25.9%)             | 81 (41.5%)          | 24.8%               |                          |
| COPD / bronchiectasis           | 160 (16.9%)             | 74 (38.0%)          | 31.6%               |                          |
| Diabetes                        | 304 (32.0%)             | 91 (46.7%)          | 23.0%               |                          |
| Heart failure                   | 78 (8.2%)               | 51 (26.2%)          | 39.5%               |                          |
| Mobility impairments            | 26 (2.7%)               | 18 (9.2%)           | 40.9%               |                          |
| MS / transverse myelitis        | 9 (1.0%)                | 2 (1.0%)            | 18.2%               |                          |
| Peripheral vascular disease     | 90 (9.5%)               | 25 (12.8%)          | 21.7%               |                          |
| Pressure / chronic ulcers       | 49 (5.2%)               | 25 (12.8%)          | 33.8%               |                          |
| Schizophrenia / psychosis       | 30 (3.2%)               | 12 (6.2%)           | 28.6%               |                          |
| <b>Comorbidity Score (0-6)</b>  |                         |                     |                     |                          |
| Mean (SD), aOR per point        | 0.98 (1.14)             | 1.86 (1.46)         |                     | 1.46 (1.28-1.65), <0.001 |
| <b>Treatment for SARS-CoV-2</b> |                         |                     |                     |                          |
| Oral antiviral                  | 92 (9.7%)               | 2 (1.0%)            | 2.1%                | 0.09 (0.02-0.38), 0.001  |
| Nirmatrelvir / ritonavir        | 70 (7.4%)               | 2 (1.0%)            | 2.8%                |                          |
| Molnupiravir                    | 22 (2.3%)               | 0 (0.0%)            | 0.0%                |                          |
| MAB                             | 76 (8.0%)               | 7 (3.6%)            | 8.4%                | 0.20 (0.09-0.48), <0.001 |
| No antiviral                    | 785 (82.7%)             | 186 (95.4%)         | 19.2%               | Referent                 |

aOR = adjusted odds ratio. CI = 95% confidence interval. BTK = Bruton tyrosine kinase. "lidomide" = thalidomide, lenalidomide, pomalidomide. MAB = monoclonal antibodies. IS = immune-suppressive medication. GC = glucocorticoid. COPD = chronic obstructive pulmonary disease. MS = multiple sclerosis.

**eTable 7.** Clinical and demographic data for patients with myelodysplastic syndromes and SARS-CoV-2 infection after vaccination, stratified by severity, and results of multivariable logistic regression analyses with severe versus non-severe infection as the outcome. Percentages of patients with severe disease are not calculated for N < 10 for a given variable.

| N = 518                                      | Severity             |                  |                  | Multivariable model      |
|----------------------------------------------|----------------------|------------------|------------------|--------------------------|
|                                              | Non-severe (N = 372) | Severe (N = 146) | % Severe (28.2%) | aOR (CI), P              |
| <b>Medications</b>                           |                      |                  |                  |                          |
| Glucocorticoids                              | 216 (58.1%)          | 97 (66.4%)       | 31.0%            |                          |
| Venetoclax                                   | 7 (1.9%)             | 1 (0.7%)         |                  |                          |
| “-lidomide”                                  | 17 (4.6%)            | 4 (2.7%)         | 19.0%            |                          |
| Proteosome                                   | 0 (0.0%)             | 1 (0.7%)         |                  |                          |
| Hydroxyurea                                  | 33 (8.9%)            | 17 (11.6%)       | 34.0%            |                          |
| Methotrexate                                 | 10 (2.7%)            | 7 (4.8%)         | 41.2%            |                          |
| JAK2 inhibitor                               | 18 (4.8%)            | 8 (5.5%)         | 30.8%            |                          |
| BCR-ABL inhibitor                            | 2 (0.5%)             | 1 (0.7%)         |                  |                          |
| Lymphocyte-depleting                         | 7 (1.9%)             | 3 (2.1%)         | 30.0%            |                          |
| Cytotoxic chemotherapy                       | 57 (15.3%)           | 22 (15.1%)       | 27.8%            |                          |
| IS non-hematologic                           | 21 (5.7%)            | 8 (5.5%)         | 27.6%            |                          |
| <b>Treatment group</b>                       |                      |                  |                  |                          |
| Combination that includes both GC and non-GC | 89 (23.9%)           | 39 (26.7%)       | 30.5%            | 1.91 (1.05-3.48), 0.19   |
| Glucocorticoids only                         | 127 (34.1%)          | 58 (39.7%)       | 31.4%            | 1.65 (0.96-2.85), 0.56   |
| Non-glucocorticoids only                     | 46 (12.4%)           | 16 (11.0%)       | 25.8%            | 1.59 (0.76-3.34), 0.81   |
| No medication                                | 110 (29.6%)          | 33 (22.6%)       | 23.1%            | Referent                 |
| <b>Age</b>                                   |                      |                  |                  |                          |
| Mean (SD), aOR per year                      | 75.22 (10.78)        | 79.73 (8.41)     |                  | 1.06 (1.03-1.09), <0.001 |
| <b>Sex</b>                                   |                      |                  |                  |                          |
| F                                            | 11 (3.0%)            | 4 (2.7%)         | 26.7%            | 2.10 (0.56-7.86), 0.27   |
| M                                            | 361 (97.0%)          | 142 (97.3%)      | 28.2%            | Referent                 |
| <b>Period of dominant variant</b>            |                      |                  |                  |                          |
| Delta                                        | 61 (16.4%)           | 40 (27.4%)       | 39.6%            | 1.15 (0.32-4.09), 0.41   |
| Omicron A                                    | 136 (36.6%)          | 48 (32.9%)       | 26.1%            | 0.81 (0.23-2.89), 0.51   |
| Omicron B                                    | 168 (45.2%)          | 53 (36.3%)       | 24.0%            | 0.84 (0.23-3.06), 0.62   |
| Pre-delta                                    | 7 (1.9%)             | 5 (3.4%)         | 41.7%            | Referent                 |

| N = 518                          | Severity                |                     | % Severe<br>(28.2%) | Multivariable model      |
|----------------------------------|-------------------------|---------------------|---------------------|--------------------------|
|                                  | Non-severe<br>(N = 372) | Severe<br>(N = 146) |                     | aOR (CI), P              |
| <b>Vaccine Type</b>              |                         |                     |                     |                          |
| Janssen                          | 11 (3.0%)               | 10 (6.9%)           | 47.6%               |                          |
| Moderna                          | 195 (52.4%)             | 72 (49.3%)          | 27.0%               |                          |
| Pfizer                           | 166 (44.6%)             | 64 (43.8%)          | 27.8%               |                          |
| <b>Immunity-related</b>          |                         |                     |                     |                          |
| Boosted                          | 222 (59.7%)             | 65 (44.5%)          | 22.6%               | 0.61 (0.37-1.01), 0.05   |
| No booster                       | 150 (40.3%)             | 81 (55.5%)          | 35.1%               | Referent                 |
| Infection before vaccinated      | 17 (4.6%)               | 6 (4.1%)            | 26.1%               |                          |
| <b>Comorbidities</b>             |                         |                     |                     |                          |
| Alzheimer's / dementia           | 45 (12.1%)              | 25 (17.1%)          | 35.7%               |                          |
| Chronic kidney disease           | 139 (37.4%)             | 63 (43.2%)          | 31.2%               |                          |
| COPD / bronchiectasis            | 77 (20.7%)              | 44 (30.1%)          | 36.4%               |                          |
| Diabetes                         | 148 (39.8%)             | 66 (45.2%)          | 30.8%               |                          |
| Heart failure                    | 79 (21.2%)              | 43 (29.5%)          | 35.2%               |                          |
| Mobility impairments             | 11 (3.0%)               | 5 (3.4%)            | 31.3%               |                          |
| MS / transverse myelitis         | 3 (0.8%)                | 0 (0.0%)            |                     |                          |
| Peripheral vascular disease      | 43 (11.6%)              | 27 (18.5%)          | 38.6%               |                          |
| Pressure / chronic ulcers        | 16 (4.3%)               | 14 (9.6%)           | 46.7%               |                          |
| Schizophrenia / psychosis        | 10 (2.7%)               | 4 (2.7%)            | 28.6%               |                          |
| <b>Comorbidity Score (0 – 6)</b> |                         |                     |                     |                          |
| Mean (SD), per point             | 1.43 (1.37)             | 1.84 (1.55)         |                     | 1.15 (0.99-1.33), 0.07   |
| <b>Treatment for SARS-CoV-2</b>  |                         |                     |                     |                          |
| Oral antiviral                   | 45 (12.1%)              | 2 (1.4%)            | 4.3%                | 0.10 (0.02-0.43), 0.02   |
| Nirmatrelvir / ritonavir         | 30 (8.1%)               | 1 (0.7%)            | 3.2%                |                          |
| Molnupiravir                     | 15 (4.0%)               | 1 (0.7%)            | 6.3%                |                          |
| MAB                              | 45 (12.1%)              | 5 (3.4%)            | 10.0%               | 0.16 (0.06-0.43), <0.001 |
| No antiviral                     | 284 (76.3%)             | 139 (95.2%)         | 32.9%               | Referent                 |

aOR = adjusted odds ratio. CI = 95% confidence interval. BTK = Bruton tyrosine kinase. “-lidomide” = thalidomide, lenalidomide, pomalidomide. MAB = monoclonal antibodies. IS = immune-suppressive medication. GC = glucocorticoid. COPD = chronic obstructive pulmonary disease. MS = multiple sclerosis.



**eTable 8.** Clinical and demographic data for patients with chronic myelogenous leukemia (coded as BCR-ABL positive) and SARS-CoV-2 infection after vaccination, stratified by severity, and results of multivariable logistic regression analyses with severe versus non-severe infection as the outcome. Percentages of patients with severe disease are not calculated for N < 10 for a given variable.

| N = 180                                      | Severity             |                 | % Severe (15.6%) | Multivariable model     |
|----------------------------------------------|----------------------|-----------------|------------------|-------------------------|
|                                              | Non-severe (N = 152) | Severe (N = 28) |                  | aOR (CI), P             |
| <b>Medications</b>                           |                      |                 |                  |                         |
| Glucocorticoids                              | 74 (48.7%)           | 21 (75.0%)      | 22.1%            |                         |
| Hydroxyurea                                  | 14 (9.2%)            | 5 (17.9%)       | 26.3%            |                         |
| Methotrexate                                 | 4 (2.6%)             | 1 (3.6%)        |                  |                         |
| JAK2 inhibitor                               | 2 (1.3%)             | 2 (7.1%)        |                  |                         |
| BCR-ABL inhibitor                            | 121 (79.6%)          | 18 (64.3%)      | 12.9%            |                         |
| Lymphocyte-depleting                         | 0 (0.0%)             | 2 (7.1%)        |                  |                         |
| Cytotoxic chemotherapy                       | 7 (4.6%)             | 5 (17.9%)       | 41.7%            |                         |
| IS non-hematologic                           | 4 (2.6%)             | 4 (14.3%)       |                  |                         |
| <b>Treatment group</b>                       |                      |                 |                  |                         |
| Combination that includes both GC and non-GC | 60 (39.5%)           | 18 (64.3%)      | 23.1%            | 3.56 (0.38-33.14), 0.10 |
| Glucocorticoids only                         | 14 (9.2%)            | 3 (10.7%)       | 17.6%            | 2.85 (0.22-36.99), 0.45 |
| Non-glucocorticoids only                     | 68 (44.7%)           | 6 (21.4%)       | 8.1%             | 1.00 (0.10-10.14), 0.23 |
| No medication                                | 10 (6.6%)            | 1 (3.6%)        | 9.1%             | Referent                |
| <b>Age</b>                                   |                      |                 |                  |                         |
| Mean (SD), aOR per year                      | 66.92 (11.23)        | 75.24 (11.06)   |                  | 1.09 (1.03-1.15), 0.003 |
| <b>Gender</b>                                |                      |                 |                  |                         |
| F                                            | 6 (4.0%)             | 2 (7.1%)        |                  | 3.56 (0.43-29.53), 0.24 |
| M                                            | 146 (96.1%)          | 26 (92.9%)      | 15.1%            | Referent                |
| <b>Period of dominant variant</b>            |                      |                 |                  |                         |
| Delta                                        | 27 (17.8%)           | 7 (25.0%)       | 20.6%            | 0.51 (0.05-5.68), 0.68  |
| Omicron A                                    | 58 (38.2%)           | 7 (25.0%)       | 10.8%            | 0.20 (0.02-2.14), 0.10  |
| Omicron B                                    | 64 (42.1%)           | 12 (42.9%)      | 15.8%            | 0.30 (0.02-3.70), 0.51  |
| Pre-delta                                    | 3 (2.0%)             | 2 (7.1%)        |                  | Referent                |
| <b>Vaccine Type</b>                          |                      |                 |                  |                         |
| Janssen                                      | 9 (5.9%)             | 2 (7.1%)        | 18.2%            |                         |
| Moderna                                      | 70 (46.1%)           | 12 (42.9%)      | 14.6%            |                         |

| N = 180                         | Severity                |                    | % Severe<br>(15.6%) | Multivariable model    |
|---------------------------------|-------------------------|--------------------|---------------------|------------------------|
|                                 | Non-severe<br>(N = 152) | Severe<br>(N = 28) |                     | aOR (CI), P            |
| Pfizer                          | 73 (48.0%)              | 14 (50.0%)         | 16.1%               |                        |
| <b>Immunity-related</b>         |                         |                    |                     |                        |
| Boosted                         | 87 (57.2%)              | 15 (53.6%)         | 14.7%               | 1.16 (0.37-3.65), 0.80 |
| No booster                      | 65 (42.8%)              | 13 (46.4%)         | 16.7%               | Referent               |
| Infection before vaccinated     | 3 (2.0%)                | 1 (3.6%)           |                     |                        |
| <b>Comorbidities</b>            |                         |                    |                     |                        |
| Alzheimer's / dementia          | 6 (4.0%)                | 4 (14.3%)          | 40.0%               |                        |
| Chronic kidney disease          | 47 (30.9%)              | 12 (42.9%)         | 20.3%               |                        |
| COPD / bronchiectasis           | 23 (15.1%)              | 8 (28.6%)          | 25.8%               |                        |
| Diabetes                        | 60 (39.5%)              | 11 (39.3%)         | 15.5%               |                        |
| Heart failure                   | 11 (7.2%)               | 7 (25.0%)          | 38.9%               |                        |
| Mobility impairments            | 3 (2.0%)                | 2 (7.1%)           |                     |                        |
| MS / transverse myelitis        | 1 (0.7%)                | 0 (0.0%)           |                     |                        |
| Peripheral vascular disease     | 7 (4.6%)                | 4 (14.3%)          | 36.4%               |                        |
| Pressure / chronic ulcers       | 2 (1.3%)                | 3 (10.7%)          |                     |                        |
| Schizophrenia / psychosis       | 2 (1.3%)                | 0 (0.0%)           |                     |                        |
| <b>Comorbidity Score, 0 – 6</b> |                         |                    |                     |                        |
| Mean (SD), per point            | 1.01 (1.17)             | 1.64 (1.34)        |                     | 1.26 (0.82-1.94), 0.28 |
| <b>Treatment for SARS-CoV-2</b> |                         |                    |                     |                        |
| Oral antiviral                  | 17 (11.2%)              | 0 (0.0%)           | 0.0%                | ND                     |
| Nirmatrelvir / ritonavir        | 10 (6.6%)               | 0 (0.0%)           | 0.0%                |                        |
| Molnupiravir                    | 8 (5.3%)                | 0 (0.0%)           |                     |                        |
| MAB                             | 21 (13.8%)              | 1 (3.6%)           | 4.5%                | 0.14 (0.02-1.16), 0.07 |
| No antiviral                    | 116 (76.3%)             | 27 (96.4%)         | 18.9%               | Referent               |

aOR = adjusted odds ratio. CI = 95% confidence interval. BTK = Bruton tyrosine kinase. “-lidomide” = thalidomide, lenalidomide, pomalidomide. MAB = monoclonal antibodies. IS = immune-suppressive medication. GC = glucocorticoid. COPD = chronic obstructive pulmonary disease. MS = multiple sclerosis.

**eTable 9.** Clinical and demographic data for patients with acute myeloblastic leukemia and SARS-CoV-2 infection after vaccination, stratified by severity, and results of multivariable logistic regression analyses with severe versus non-severe infection as the outcome. Percentages of patients with severe disease are not calculated for N < 10 for a given variable.

| N = 172                                      | Severity                |                    | % Severe<br>(25.0%) | Multivariable model      |
|----------------------------------------------|-------------------------|--------------------|---------------------|--------------------------|
|                                              | Non-severe<br>(N = 129) | Severe<br>(N = 43) |                     | aOR (CI), P              |
| <b>Medications</b>                           |                         |                    |                     |                          |
| Glucocorticoids                              | 61 (47.3%)              | 23 (53.5%)         | 27.4%               |                          |
| BTK inhibitor                                | 1 (0.8%)                | 0 (0.0%)           |                     |                          |
| Venetoclax                                   | 51 (39.5%)              | 19 (44.2%)         | 27.1%               |                          |
| “lidomide”                                   | 3 (2.3%)                | 0 (0.0%)           |                     |                          |
| Hydroxyurea                                  | 15 (11.6%)              | 7 (16.3%)          | 31.8%               |                          |
| Methotrexate                                 | 5 (3.9%)                | 1 (2.3%)           |                     |                          |
| JAK2 inhibitor                               | 7 (5.4%)                | 2 (4.7%)           |                     |                          |
| BCR-ABL inhibitor                            | 3 (2.3%)                | 2 (4.7%)           |                     |                          |
| Lymphocyte-depleting                         | 4 (3.1%)                | 2 (4.7%)           |                     |                          |
| Cytotoxic chemotherapy                       | 57 (44.2%)              | 20 (46.5%)         | 26.0%               |                          |
| IS non-hematologic                           | 21 (16.3%)              | 3 (7.0%)           | 12.5%               |                          |
| <b>Treatment group</b>                       |                         |                    |                     |                          |
| Combination that includes both GC and non-GC | 43 (33.3%)              | 15 (34.9%)         | 25.9%               | 0.87 (0.27-2.88), 0.99   |
| Glucocorticoids only                         | 18 (14.0%)              | 8 (18.6%)          | 30.8%               | 1.24 (0.31-5.07), 0.40   |
| Non-glucocorticoids only                     | 46 (35.7%)              | 12 (27.9%)         | 20.7%               | 0.53 (0.15-1.84), 0.15   |
| No medication                                | 22 (17.1%)              | 8 (18.6%)          | 26.7%               | Referent                 |
| <b>Age</b>                                   |                         |                    |                     |                          |
| Mean (SD), aOR per year                      | 67.72 (12.26)           | 74.90 (7.44)       |                     | 1.08 (1.04-1.14), <0.001 |
| <b>Sex</b>                                   |                         |                    |                     |                          |
| F                                            | 8 (6.2%)                | 2 (4.7%)           |                     | 0.94 (0.14-6.50), 0.95   |
| M                                            | 121 (93.8%)             | 41 (95.4%)         | 25.3%               | Referent                 |
| <b>Period of dominant variant</b>            |                         |                    |                     |                          |
| Delta                                        | 24 (18.6%)              | 10 (23.3%)         | 29.4%               | 0.98 (0.13-7.35), 0.94   |
| Omicron A                                    | 56 (43.4%)              | 14 (32.6%)         | 20.0%               | 0.63 (0.08-4.84), 0.29   |
| Omicron B                                    | 45 (34.9%)              | 17 (39.5%)         | 27.4%               | 1.31 (0.16-11.00), 0.47  |
| Pre-delta                                    | 4 (3.1%)                | 2 (4.7%)           |                     | Referent                 |

| N = 172                          | Severity                |                    |                     | Multivariable model    |
|----------------------------------|-------------------------|--------------------|---------------------|------------------------|
|                                  | Non-severe<br>(N = 129) | Severe<br>(N = 43) | % Severe<br>(25.0%) | aOR (CI), P            |
| <b>Vaccine Type</b>              |                         |                    |                     |                        |
| Janssen                          | 8 (6.2%)                | 5 (11.6%)          | 38.5%               |                        |
| Moderna                          | 56 (43.4%)              | 21 (48.8%)         | 27.3%               |                        |
| Pfizer                           | 65 (50.4%)              | 17 (39.5%)         | 20.7%               |                        |
| <b>Immunity-related</b>          |                         |                    |                     |                        |
| Boosted                          | 69 (53.5%)              | 22 (51.2%)         | 24.2%               | 1.03 (0.36-2.94), 0.96 |
| No booster                       | 60 (46.5%)              | 21 (48.8%)         | 25.9%               |                        |
| Infection before vaccine         | 9 (7.0%)                | 2 (4.7%)           | 18.2%               |                        |
| <b>Comorbidities</b>             |                         |                    |                     |                        |
| Alzheimer's / dementia           | 8 (6.2%)                | 3 (7.0%)           | 27.3%               |                        |
| Chronic kidney disease           | 36 (27.9%)              | 14 (32.6%)         | 28.0%               |                        |
| COPD / bronchiectasis            | 20 (15.5%)              | 9 (20.9%)          | 31.0%               |                        |
| Diabetes                         | 44 (34.1%)              | 16 (37.2%)         | 26.7%               |                        |
| Heart failure                    | 11 (8.5%)               | 6 (14.0%)          | 35.3%               |                        |
| Mobility impairments             | 1 (0.8%)                | 0 (0.0%)           |                     |                        |
| MS / transverse myelitis         | 1 (0.8%)                | 0 (0.0%)           |                     |                        |
| Peripheral vascular disease      | 6 (4.7%)                | 3 (7.0%)           |                     |                        |
| Pressure / chronic ulcers        | 4 (3.1%)                | 0 (0.0%)           |                     |                        |
| Schizophrenia / psychosis        | 2 (1.6%)                | 1 (2.3%)           |                     |                        |
| <b>Comorbidity Score (0 – 6)</b> |                         |                    |                     |                        |
| Mean (SD), aOR per point         | 0.97 (1.07)             | 1.19 (1.18)        |                     | 1.04 (0.71-1.54), 0.83 |
| <b>Treatment for SARS-CoV-2</b>  |                         |                    |                     |                        |
| Oral antiviral                   | 19 (14.7%)              | 1 (2.3%)           | 5.0%                | 0.08 (0.01-0.68), 0.02 |
| Nirmatrelvir / ritonavir         | 12 (9.3%)               | 1 (2.3%)           | 7.7%                |                        |
| Molnupiravir                     | 7 (5.4%)                | 0 (0.0%)           |                     |                        |
| MAB                              | 20 (15.5%)              | 2 (4.7%)           | 9.1%                | 0.18 (0.03-0.92), 0.04 |
| No antiviral                     | 90 (70.0%)              | 41 (95.4%)         | 31.3%               | Referent               |

aOR = adjusted odds ratio. CI = 95% confidence interval. BTK = Bruton tyrosine kinase. “-lidomide” = thalidomide, lenalidomide, pomalidomide. MAB = monoclonal antibodies. IS = immune-suppressive medication. GC = glucocorticoid. COPD = chronic obstructive pulmonary disease. MS = multiple sclerosis.

**eTable 10.** Clinical characteristics of patients with SARS-CoV-2 infection after vaccination, by subgroup of hematologic malignancy.

|                                              | <b>All</b>   | <b>HL</b>    | <b>NHL</b>   | <b>CLL</b>  | <b>PC</b>   | <b>MPD</b>   | <b>MDS</b>   | <b>CML</b>   | <b>AML</b>   |
|----------------------------------------------|--------------|--------------|--------------|-------------|-------------|--------------|--------------|--------------|--------------|
| N                                            | 6122         | 157          | 1731         | 1206        | 1014        | 1144         | 518          | 180          | 172          |
| % severe                                     | 21.3%        | 12.1%        | 20.9%        | 22.8%       | 23.1%       | 17.0%        | 28.2%        | 15.6%        | 25.0%        |
| <b>Medications</b>                           |              |              |              |             |             |              |              |              |              |
| Glucocorticoids                              | 59.3%        | 57.3%        | 66.2%        | 55.1%       | 58.6%       | 56.3%        | 60.4%        | 52.8%        | 48.8%        |
| BTK inhibitor                                | 6.8%         |              | 1.8%         | 28.0%       | 4.4%        |              |              |              | 0.6%         |
| Venetoclax                                   | 3.0%         |              | 0.3%         | 7.5%        | 0.8%        |              | 1.5%         |              | 40.7%        |
| “-lidomide”                                  | 9.1%         |              | 2.4%         | 0.2%        | 47.7%       | 0.3%         | 4.1%         |              | 1.7%         |
| Proteasome inhibitor                         | 6.7%         |              | 0.2%         |             | 40.3%       |              | 0.2%         |              |              |
| MAB for myeloma                              | 3.4%         |              | 0.1%         | 0.1%        | 20.2%       |              |              |              |              |
| Hydroxyurea                                  | 5.7%         |              | 0.2%         | 0.2%        |             | 22.1%        | 9.7%         | 10.6%        | 12.8%        |
| Methotrexate                                 | 3.8%         | 1.9%         | 7.1%         | 3.1%        | 2.2%        | 1.7%         | 3.3%         | 2.8%         | 3.5%         |
| JAK2 inhibitor                               | 1.3%         |              |              | 0.1%        |             | 3.3%         | 5.0%         | 2.2%         | 5.2%         |
| BCR-ABL inhibitor                            | 2.5%         |              | 0.1%         | 0.1%        | 0.1%        | 0.2%         | 0.6%         | 77.2%        | 2.9%         |
| Lymphocyte-depleting                         | 13.4%        | 6.4%         | 29.8%        | 15.4%       | 7.5%        | 1.2%         | 1.9%         | 1.1%         | 3.5%         |
| Cytotoxic chemotherapy                       | 18.8%        | 19.1%        | 29.8%        | 12.4%       | 23.5%       | 4.5%         | 15.3%        | 6.7%         | 44.8%        |
| IS non-hematologic                           | 4.5%         | 5.7%         | 4.6%         | 1.7%        | 3.8%        | 5.8%         | 5.6%         | 4.4%         | 14.0%        |
| <b>Treatment combinations</b>                |              |              |              |             |             |              |              |              |              |
| Combination that includes both GC and non-GC | 31.1%        | 21.7%        | 34.9%        | 28.4%       | 42.8%       | 19.8%        | 24.7%        | 43.3%        | 33.7%        |
| GC only                                      | 28.2%        | 35.7%        | 31.3%        | 26.7%       | 15.8%       | 36.5%        | 35.7%        | 9.4%         | 15.1%        |
| Non-GC only                                  | 14.8%        | 5.7%         | 7.6%         | 14.8%       | 23.5%       | 13.5%        | 12.0%        | 41.1%        | 33.7%        |
| No medication                                | 25.9%        | 36.9%        | 26.2%        | 30.2%       | 17.9%       | 30.2%        | 27.6%        | 6.1%         | 17.4%        |
| <b>Age</b>                                   |              |              |              |             |             |              |              |              |              |
| Mean (SD)                                    | 70.9 (11.57) | 61.4 (13.02) | 71.1 (11.27) | 74.3 (8.98) | 72.4 (9.39) | 65.1 (13.54) | 76.5 (10.11) | 68.2 (11.20) | 69.5 (11.06) |
| <b>Sex</b>                                   |              |              |              |             |             |              |              |              |              |
| F                                            | 5.0%         | 12.1%        | 5.1%         | 2.0%        | 3.3%        | 9.7%         | 2.9%         | 4.4%         | 5.8%         |
| M                                            | 95.0%        | 87.9%        | 94.9%        | 98.0%       | 96.7%       | 90.3%        | 97.1%        | 95.6%        | 94.2%        |
| <b>Period of dominant variant</b>            |              |              |              |             |             |              |              |              |              |
| Delta                                        | 18.0%        | 17.2%        | 17.4%        | 18.7%       | 18.1%       | 17.0%        | 19.5%        | 18.9%        | 19.8%        |
| Omicron A                                    | 38.7%        | 46.5%        | 38.4%        | 39.2%       | 39.1%       | 38.7%        | 35.5%        | 36.1%        | 40.7%        |
| Omicron B                                    | 40.5%        | 33.8%        | 41.3%        | 39.1%       | 40.1%       | 41.4%        | 42.7%        | 42.2%        | 36.0%        |
| Pre-delta                                    | 2.8%         | 2.5%         | 2.8%         | 3.0%        | 2.7%        | 2.8%         | 2.3%         | 2.8%         | 3.5%         |
| <b>Immunity-related</b>                      |              |              |              |             |             |              |              |              |              |

|                                 | <b>All</b>  | <b>HL</b>   | <b>NHL</b>  | <b>CLL</b>  | <b>PC</b>   | <b>MPD</b>  | <b>MDS</b>  | <b>CML</b>  | <b>AML</b>  |
|---------------------------------|-------------|-------------|-------------|-------------|-------------|-------------|-------------|-------------|-------------|
| Boosted                         | 56.6%       | 43.9%       | 60.1%       | 61.4%       | 61.6%       | 44.9%       | 55.4%       | 56.7%       | 52.9%       |
| Infection before vaccine        | 4.3%        | 3.8%        | 3.8%        | 3.5%        | 4.1%        | 6.1%        | 4.4%        | 2.2%        | 6.4%        |
| <b>Comorbidities</b>            |             |             |             |             |             |             |             |             |             |
| Alzheimer's / dementia          | 7.1%        | 2.5%        | 5.5%        | 6.7%        | 7.0%        | 8.3%        | 13.5%       | 5.6%        | 6.4%        |
| Chronic kidney disease          | 30.3%       | 20.4%       | 26.3%       | 27.4%       | 39.5%       | 27.7%       | 39.0%       | 32.8%       | 29.1%       |
| COPD / bronchiectasis           | 18.4%       | 10.2%       | 18.8%       | 16.7%       | 16.8%       | 20.5%       | 23.7%       | 17.2%       | 16.9%       |
| Diabetes                        | 38.4%       | 28.0%       | 39.6%       | 37.7%       | 42.2%       | 34.5%       | 41.3%       | 39.4%       | 34.9%       |
| Heart failure                   | 12.9%       | 11.5%       | 11.9%       | 10.4%       | 15.4%       | 11.3%       | 23.6%       | 10.0%       | 9.9%        |
| Mobility impairments            | 2.1%        | 3.2%        | 1.4%        | 10.4%       | 2.0%        | 3.8%        | 3.1%        | 2.8%        | 0.6%        |
| MS / transverse myelitis        | 0.6%        | 1.9%        | 0.2%        | 0.6%        | 0.6%        | 1.0%        | 0.6%        | 0.6%        | 0.6%        |
| Peripheral vascular disease     | 8.7%        | 1.9%        | 7.7%        | 8.0%        | 9.3%        | 10.1%       | 13.5%       | 6.1%        | 5.2%        |
| Pressure / chronic ulcers       | 4.2%        | 1.9%        | 3.1%        | 3.3%        | 4.6%        | 6.5%        | 5.8%        | 2.8%        | 2.3%        |
| Schizophrenia / psychosis       | 2.5%        | 1.9%        | 2.1%        | 1.9%        | 2.7%        | 3.7%        | 2.7%        | 1.1%        | 1.7%        |
| <b>Comorbidity score</b>        |             |             |             |             |             |             |             |             |             |
| Mean (SD)                       | 1.16 (1.19) | 0.74 (1.03) | 1.10 (1.14) | 1.07 (1.14) | 1.30 (1.18) | 1.13 (1.19) | 1.55 (1.42) | 1.11 (1.20) | 1.03 (1.10) |
| <b>Treatment for SARS-CoV-2</b> |             |             |             |             |             |             |             |             |             |
| Oral antiviral                  | 10.7%       | 8.9%        | 12.1%       | 12.8%       | 9.9%        | 8.2%        | 9.1%        | 9.4%        | 11.6%       |
| MAB                             | 10.5%       | 10.2%       | 10.0%       | 13.5%       | 11.1%       | 7.3%        | 9.7%        | 12.2%       | 12.8%       |

HL = Hodgkin's lymphoma. NHL = non-Hodgkin's lymphoma. CLL = chronic lymphocytic leukemia. PC = plasmacytoid malignancy (myeloma or Waldenstrom's). MPD = myeloproliferative disorder without a diagnosis of MDS or CML. MDS = myelodysplastic syndromes. CML = chronic lymphocytic leukemia. AML = acute myeloblastic leukemia. BTK = Bruton tyrosine kinase. "-lidomide" = thalidomide, lenalidomide, pomalidomide. MAB = monoclonal antibodies. IS = immune-suppressive medication. GC = glucocorticoid. COPD = chronic obstructive pulmonary disease. MS = multiple sclerosis.

**eTable 11.** Clinical characteristics of patients with severe COVID-19 after vaccination, by subgroup of hematologic malignancy.

| <b>N = 6122</b>                              | <b>All</b>   | <b>HL</b>    | <b>NHL</b>  | <b>CLL</b>  | <b>PC</b>   | <b>MPD</b>   | <b>MDS</b>  | <b>CML</b>   | <b>AML</b>  |
|----------------------------------------------|--------------|--------------|-------------|-------------|-------------|--------------|-------------|--------------|-------------|
| N                                            | 1301         | 19           | 361         | 275         | 234         | 195          | 146         | 28           | 43          |
| <b>Medications</b>                           |              |              |             |             |             |              |             |              |             |
| Glucocorticoids                              | 67.4%        | 42.1%        | 73.7%       | 68.0%       | 62.8%       | 65.6%        | 66.4%       | 75.0%        | 53.5%       |
| BTK inhibitor                                | 9.2%         |              | 1.9%        | 36.4%       | 5.6%        |              |             |              |             |
| Venetoclax                                   | 3.5%         |              | 0.6%        | 7.3%        | 1.3%        |              | 0.7%        |              | 44.2%       |
| “-lidomide”                                  | 11.6%        |              | 3.9%        | 0.7%        | 55.6%       | 0.5%         | 2.7%        |              |             |
| Proteasome inhibitor                         | 9.8%         |              | 0.3%        |             | 53.4%       |              | 0.7%        |              |             |
| MAB for myeloma                              | 5.1%         |              |             |             | 28.2%       |              |             |              |             |
| Hydroxyurea                                  | 5.1%         |              | 0.6%        | 0.7%        |             | 16.9%        | 11.6%       | 17.9%        | 16.3%       |
| Methotrexate                                 | 4.7%         |              | 9.1%        | 5.5%        | 0.9%        | 1.0%         | 4.8%        | 3.6%         | 2.3%        |
| JAK2 inhibitor                               | 1.5%         |              |             |             |             | 4.1%         | 5.5%        | 7.1%         | 4.7%        |
| BCR-ABL inhibitor                            | 1.7%         |              |             |             | 0.4%        |              | 0.7%        | 64.3%        | 4.7%        |
| Lymphocyte-depleting                         | 17.4%        | 10.5%        | 39.3%       | 18.9%       | 8.1%        | 2.1%         | 2.1%        | 7.1%         | 4.7%        |
| Cytotoxic chemotherapy                       | 24.3%        | 21.1%        | 39.6%       | 15.3%       | 26.9%       | 8.7%         | 15.1%       | 17.9%        | 46.5%       |
| IS non-hematologic                           | 5.1%         | 5.3%         | 5.0%        | 2.6%        | 4.7%        | 7.2%         | 5.5%        | 14.3%        | 7.0%        |
| <b>Treatment combinations</b>                |              |              |             |             |             |              |             |              |             |
| Combination that includes both GC and non-GC | 39.9%        | 21.1%        | 44.3%       | 42.6%       | 50.9%       | 24.1%        | 26.7%       | 64.3%        | 34.9%       |
| GC only                                      | 27.5%        | 21.1%        | 29.4%       | 25.5%       | 12.0%       | 41.5%        | 39.7%       | 10.7%        | 18.6%       |
| Non-GC only                                  | 14.0%        | 10.5%        | 9.1%        | 12.4%       | 25.6%       | 9.7%         | 11.0%       | 21.4%        | 27.9%       |
| No medication                                | 18.6%        | 47.4%        | 17.2%       | 19.6%       | 11.5%       | 24.6%        | 22.6%       | 3.6%         | 18.6%       |
| <b>Age</b>                                   |              |              |             |             |             |              |             |              |             |
| Mean (SD)                                    | 75.3 (10.06) | 63.3 (12.49) | 75.0 (9.77) | 77.3 (9.06) | 74.5 (9.33) | 72.1 (11.76) | 79.7 (8.41) | 75.2 (11.06) | 74.9 (7.44) |
| <b>Sex</b>                                   |              |              |             |             |             |              |             |              |             |
| F                                            | 3.5%         | 10.5%        | 3.9%        | 2.9%        | 1.7%        | 4.6%         | 2.7%        | 7.1%         | 4.7%        |
| M                                            | 96.5%        | 89.5%        | 96.1%       | 97.1%       | 98.3%       | 95.4%        | 97.3%       | 92.9%        | 95.4%       |
| <b>Period of dominant variant</b>            |              |              |             |             |             |              |             |              |             |
| Delta                                        | 25.4%        | 21.1%        | 21.6%       | 22.9%       | 34.2%       | 25.1%        | 27.4%       | 25.0%        | 23.3%       |
| OmicronA                                     | 34.3%        | 42.1%        | 34.9%       | 38.9%       | 32.1%       | 31.3%        | 32.9%       | 25.0%        | 32.6%       |
| OmicronB                                     | 36.5%        | 31.6%        | 39.0%       | 34.2%       | 30.3%       | 41.5%        | 36.3%       | 42.9%        | 39.5%       |
| Pre-delta                                    | 3.8%         | 5.3%         | 4.4%        | 4.0%        | 3.4%        | 2.1%         | 3.4%        | 7.1%         | 4.7%        |
| <b>Immunity-related</b>                      |              |              |             |             |             |              |             |              |             |
| Boosted                                      | 49.9%        | 26.3%        | 54.9%       | 55.6%       | 48.3%       | 40.0%        | 44.5%       | 53.6%        | 51.2%       |
| Infection before vaccine                     | 3.2%         | 5.3%         | 3.3%        | 1.8%        | 3.0%        | 4.1%         | 4.1%        | 3.6%         | 4.7%        |
| <b>Comorbidities</b>                         |              |              |             |             |             |              |             |              |             |

| <b>N = 6122</b>                 | <b>All</b>  | <b>HL</b>   | <b>NHL</b>  | <b>CLL</b>  | <b>PC</b>   | <b>MPD</b>  | <b>MDS</b>  | <b>CML</b>  | <b>AML</b>  |
|---------------------------------|-------------|-------------|-------------|-------------|-------------|-------------|-------------|-------------|-------------|
| Alzheimer's / dementia          | 13.3%       | 15.8%       | 10.8%       | 12.4%       | 10.3%       | 21.0%       | 17.1%       | 14.6%       | 7.0%        |
| Chronic kidney disease          | 40.4%       | 36.8%       | 37.1%       | 32.7%       | 53.0%       | 41.5%       | 43.2%       | 42.9%       | 32.6%       |
| COPD / bronchiectasis           | 28.4%       | 10.5%       | 31.0%       | 22.9%       | 24.4%       | 38.0%       | 30.1%       | 28.6%       | 20.9%       |
| Diabetes                        | 46.9%       | 36.8%       | 48.5%       | 41.8%       | 55.1%       | 46.7%       | 45.2%       | 39.3%       | 37.2%       |
| Heart failure                   | 22.8%       | 21.1%       | 23.0%       | 17.1%       | 23.9%       | 26.2%       | 29.5%       | 25.0%       | 14.0%       |
| Mobility impairments            | 3.8%        | 5.3%        | 2.8%        | 1.5%        | 3.9%        | 9.2%        | 3.4%        | 7.1%        |             |
| MS / transverse myelitis        | 0.4%        | 5.3%        |             | 0.4%        | 0.4%        | 1.0%        |             |             |             |
| Peripheral vascular disease     | 14.0%       |             | 12.7%       | 14.2%       | 16.2%       | 12.8%       | 18.5%       | 14.3%       | 7.0%        |
| Pressure / chronic ulcers       | 7.7%        | 5.3%        | 6.7%        | 5.1%        | 8.1%        | 12.8%       | 9.6%        | 10.7%       |             |
| Schizophrenia / psychosis       | 2.9%        |             | 1.9%        | 1.8%        | 3.9%        | 6.2%        | 2.7%        |             | 2.3%        |
| <b>Comorbidity score</b>        |             |             |             |             |             |             |             |             |             |
| Mean (SD)                       | 1.66 (1.39) | 1.21 (1.18) | 1.63 (1.37) | 1.41 (1.35) | 1.83 (1.33) | 1.86 (1.46) | 1.84 (1.55) | 1.64 (1.34) | 1.19 (1.18) |
| <b>Treatment for SARS-CoV-2</b> |             |             |             |             |             |             |             |             |             |
| Oral antiviral                  | 1.9%        |             | 2.8%        | 1.5%        | 2.6%        | 1.0%        | 1.4%        |             | 2.3%        |
| MAB                             | 6.4%        | 10.5%       | 7.8%        | 8.4%        | 6.4%        | 3.6%        | 3.4%        | 3.6%        | 4.7%        |

HL = Hodgkin's lymphoma. NHL = non-Hodgkin's lymphoma. CLL = chronic lymphocytic leukemia. PC = plasmacytoid malignancy (myeloma or Waldenstrom's). MPD = myeloproliferative disorder without a diagnosis of MDS or CML. MDS = myelodysplastic syndromes. CML = chronic lymphocytic leukemia. AML = acute myeloblastic leukemia. BTK = Bruton tyrosine kinase. "-lidomide" = thalidomide, lenalidomide, pomalidomide. MAB = monoclonal antibodies. IS = immune-suppressive medication. GC = glucocorticoid. COPD = chronic obstructive pulmonary disease. MS = multiple sclerosis.



## eAppendix

### Timing of initial vaccination, infection, and diagnosis of malignancy

The initial vaccination series had been completed by April 30, 2021, in 83% of patients. The time from initial vaccination to infection was similar among patients with non-severe or severe COVID-19, either among boosted (median 396 days, interquartile range 309 – 482, for non-severe; median 385 days, interquartile range 309 – 486, for severe) or unboosted patients (median 242 days, interquartile range 155 – 314, for non-severe; median 224 days, interquartile range 153 – 304 for severe). The first use of an ICD-10 code for hematologic malignancy occurred on or before September 30, 2022, in 5852/6122 (95.6%) of patients.

### Sub-analyses limited to the omicron B period

Because use of oral antivirals was restricted to the omicron B period, we performed an additional analysis limited to the 2480 patients infected between March 1 and September 30, 2022 (**eTable 12**).

We then further limited this subcohort to the 925 patients who had received a booster vaccine and had good evidence for having active hematologic malignancy, based on treatment with non-glucocorticoid immune-suppressive or antineoplastic drugs. Oral antivirals were used in 227/925 (22.8%) patients, with severe disease developing in 12/227 (5.3%) cases. Among the 643 patients who received no oral antiviral treatment or MAB, 181 (28.1%) either had severe COVID-19 at initial evaluation or developed it subsequently, a distinction that could not be made. Classification of these 643 patients into 16 bins by age ranges and comorbidity scores suggested that rates of severe COVID-19 increased most prominently with age > 80 or comorbidity score > 2 (**eTable 13**). Although these data are exploratory due to the small numbers of cases in each bin and inability to adjust for other variables, the pattern was similar to that seen among the 571 patients infected in the omicron A period (infection December 16, 2021, through February 28, 2022) who had actively treated hematologic malignancy, had been boosted, and did not receive antiviral treatment (**eTable 13**).

**eTable 12.** Clinical and demographic data for the subcohort of 2480 patients with hematologic malignancies and SARS-CoV-2 infection after vaccination between March 1 and September 30, 2022 (Omicron B), stratified by severity, and results of multivariable logistic regression analyses with severe versus non-severe infection as the outcome.

| N = 2480                                     | Severity                 |                     | % Severe<br>(19.2%) | Multivariable models, aOR (CI), P |                          |
|----------------------------------------------|--------------------------|---------------------|---------------------|-----------------------------------|--------------------------|
|                                              | Non-severe<br>(N = 2005) | Severe<br>(N = 475) |                     | Individual<br>comorbidities       | Comorbidity<br>Score     |
| <b>Medications</b>                           |                          |                     |                     |                                   |                          |
| Glucocorticoids                              | 1101 (54.9%)             | 328 (69.1%)         | 23.0%               |                                   |                          |
| BTK inhibitor                                | 122 (6.1%)               | 35 (7.4%)           | 22.3%               |                                   |                          |
| Venetoclax                                   | 45 (2.2%)                | 16 (3.4%)           | 26.2%               |                                   |                          |
| “-lidomide”                                  | 165 (8.2%)               | 47 (9.9%)           | 22.2%               |                                   |                          |
| Proteasome inhibitor                         | 116 (5.8%)               | 45 (9.5%)           | 28.0%               |                                   |                          |
| MAB for myeloma                              | 56 (2.8%)                | 23 (4.8%)           | 29.1%               |                                   |                          |
| Hydroxyurea                                  | 121 (6.0%)               | 29 (6.1%)           | 19.3%               |                                   |                          |
| Methotrexate                                 | 79 (3.9%)                | 24 (5.1%)           | 23.2%               |                                   |                          |
| JAK2 inhibitor                               | 24 (1.2%)                | 9 (1.9%)            | 27.3%               |                                   |                          |
| BCR-ABL inhibitor                            | 54 (2.7%)                | 8 (1.7%)            | 12.9%               |                                   |                          |
| Lymphocyte-depleting                         | 236 (11.8%)              | 75 (15.8%)          | 24.1%               |                                   |                          |
| Cytotoxic chemotherapy                       | 327 (16.3%)              | 116 (24.4%)         | 26.2%               |                                   |                          |
| IS non-hematologic                           | 88 (4.4%)                | 22 (4.6%)           | 20.0%               |                                   |                          |
| <b>Treatment group</b>                       |                          |                     |                     |                                   |                          |
| Combination that includes both GC and non-GC | 557 (27.8%)              | 180 (37.9%)         | 24.4%               | 2.56 (1.87-3.50), <0.001          | 2.63 (1.93-3.58), <0.001 |
| GC only                                      | 544 (27.1%)              | 148 (31.2%)         | 21.4%               | 1.83 (1.33-2.53), 0.44            | 1.93 (1.41-2.65), 0.26   |
| Non-GC only                                  | 305 (15.2%)              | 69 (14.5%)          | 18.5%               | 1.81 (1.25-2.62), 0.63            | 1.80 (1.25-2.61), 0.76   |
| No medication                                | 599 (29.9%)              | 78 (16.4%)          | 11.5%               | Referent                          | Referent                 |
| <b>Disease group</b>                         |                          |                     |                     |                                   |                          |
| Lymphoid                                     | 1335 (66.6%)             | 312 (65.7%)         | 18.9%               |                                   |                          |
| Myeloid                                      | 670 (33.4%)              | 163 (34.3%)         | 19.6%               |                                   |                          |
| <b>Disease Class</b>                         |                          |                     |                     |                                   |                          |

| N = 2480                 | Severity                 |                     | % Severe<br>(19.2%) | Multivariable models, aOR (CI), P |                          |
|--------------------------|--------------------------|---------------------|---------------------|-----------------------------------|--------------------------|
|                          | Non-severe<br>(N = 2005) | Severe<br>(N = 475) |                     | Individual<br>comorbidities       | Comorbidity<br>Score     |
| AML                      | 45 (2.2%)                | 17 (3.6%)           | 27.4%               |                                   |                          |
| CLL                      | 378 (18.9%)              | 94 (19.8%)          | 19.9%               |                                   |                          |
| CML                      | 64 (3.2%)                | 2 (2.5%)            | 15.8%               |                                   |                          |
| HL                       | 47 (2.3%)                | 6 (1.3%)            | 11.3%               |                                   |                          |
| MDS                      | 168 (8.4%)               | 53 (11.2%)          | 24.0%               |                                   |                          |
| MPD                      | 393 (19.6%)              | 81 (17.1%)          | 17.1%               |                                   |                          |
| NHL                      | 574 (28.6%)              | 141 (29.7%)         | 19.7%               |                                   |                          |
| PC                       | 336 (16.8%)              | 71 (15.0%)          | 17.4%               |                                   |                          |
| <b>Age</b>               |                          |                     |                     |                                   |                          |
| Mean (SD), aOR per year  | 70.90 (11.61)            | 75.88 (10.50)       |                     | 1.04 (1.03-1.06), <0.001          | 1.04 (1.03-1.06), <0.001 |
| <b>Gender</b>            |                          |                     |                     |                                   |                          |
| F                        | 102 (5.1%)               | 26 (5.5%)           | 20.3%               | 2.14 (1.30-3.54), 0.003           | 2.12 (1.28-3.50), 0.003  |
| M                        | 1903 (94.9%)             | 449 (94.5%)         | 19.1%               | Referent                          | Referent                 |
| <b>Vaccine Type</b>      |                          |                     |                     |                                   |                          |
| Janssen                  | 76 (3.8%)                | 23 (4.8%)           | 23.3%               |                                   |                          |
| Moderna                  | 993 (49.5%)              | 220 (46.3%)         | 18.1%               |                                   |                          |
| Pfizer                   | 936 (46.7%)              | 232 (48.8%)         | 19.9%               |                                   |                          |
| <b>Immunity-related</b>  |                          |                     |                     |                                   |                          |
| Boosted                  | 1598 (79.7%)             | 363 (76.4%)         | 18.5%               | 0.73 (0.56-0.94), 0.02            | 0.72 (0.55-0.93), 0.01   |
| No booster               | 407 (20.3%)              | 112 (23.6%)         | 21.6%               | Referent                          | Referent                 |
| Infection before vaccine | 70 (3.5%)                | 7 (1.5%)            | 9.1%                |                                   |                          |
| <b>Comorbidities</b>     |                          |                     |                     |                                   |                          |
| Alzheimer's / dementia   | 127 (6.3%)               | 72 (15.2%)          | 36.2%               | 1.61 (1.14-2.27), 0.007           |                          |
| Chronic kidney disease   | 552 (27.5%)              | 177 (37.3%)         | 24.3%               | 0.96 (0.75-1.24), 0.77            |                          |
| COPD / bronchiectasis    | 300 (15.0%)              | 145 (30.5%)         | 32.6%               | 1.90 (1.46-2.46), <0.001          |                          |
| Diabetes                 | 709 (35.4%)              | 225 (47.4%)         | 24.1%               | 1.53 (1.21-1.92), <0.001          |                          |

| N = 2480                        | Severity                 |                     |                     | Multivariable models, aOR (CI), P |                          |
|---------------------------------|--------------------------|---------------------|---------------------|-----------------------------------|--------------------------|
|                                 | Non-severe<br>(N = 2005) | Severe<br>(N = 475) | % Severe<br>(19.2%) | Individual<br>comorbidities       | Comorbidity<br>Score     |
| Heart failure                   | 199 (9.9%)               | 103 (21.7%)         | 34.1%               | 1.54 (1.14-1.10), 0.006           |                          |
| Liver / cirrhosis               | 151 (7.5%)               | 45 (9.5%)           | 23.0%               |                                   |                          |
| Mobility impairments            | 36 (1.8%)                | 4 (5.1%)            | 40.0%               |                                   |                          |
| MS / transverse myelitis        | 8 (0.4%)                 | 0 (0.0%)            |                     |                                   |                          |
| Peripheral vascular disease     | 148 (7.4%)               | 64 (13.5%)          | 30.2%               | 1.17 (0.82-1.66), 0.39            |                          |
| Pressure / chronic ulcers       | 65 (3.2%)                | 41 (8.6%)           | 38.7%               |                                   |                          |
| Schizophrenia / psychosis       | 1 (2.0%)                 | 11 (2.3%)           | 21.2%               |                                   |                          |
| <b>Comorbidity Score (0-6)</b>  |                          |                     |                     |                                   |                          |
| Mean (SD), aOR per point        | 1.01 (1.14)              | 1.65 (1.36)         |                     |                                   | 1.37 (1.26-1.49), <0.001 |
| <b>Treatment for SARS-CoV-2</b> |                          |                     |                     |                                   |                          |
| Oral antiviral                  | 518 (25.8%)              | 20 (4.2%)           | 3.7%                | 0.12 (0.08-0.20), <0.001          | 0.12 (0.08-0.20), <0.001 |
| Nirmatrelvir / ritonavir        | 370 (18.5%)              | 12 (2.5%)           | 3.1%                |                                   |                          |
| Molnupiravir                    | 149 (7.4%)               | 8 (1.7%)            | 5.1%                |                                   |                          |
| MAB                             | 100 (5.0 %)              | 17 (3.6%)           | 14.5%               | 0.43 (0.25-0.74), 0.002           | 0.43 (0.25-0.74), 0.002  |
| No antiviral                    | 1395 (69.6%)             | 439 (92.4%)         | 23.9%               | Referent                          | Referent                 |

aOR = adjusted odds ratio. CI = 95% confidence interval. HL = Hodgkin's lymphoma. NHL = non-Hodgkin's lymphoma. CLL = chronic lymphocytic leukemia. PC = plasmacytoid malignancy (myeloma or Waldenstrom's). MPD = myeloproliferative disorder without a diagnosis of MDS or CML. MDS = myelodysplastic syndromes. CML = chronic lymphocytic leukemia. AML = acute myeloblastic leukemia. BTK = Bruton tyrosine kinase. "-lidomide" = thalidomide, lenalidomide, pomalidomide. MAB = monoclonal antibodies. IS = immune-suppressive medication. GC = glucocorticoid. COPD = chronic obstructive pulmonary disease. MS = multiple sclerosis

**eTable 13.** Numbers and percentages of patients with severe COVID-19, stratified by age and number of specified comorbidities. Numerators = numbers of patients with severe COVID-19; denominators = numbers of patients with infection of any severity. The subcohort was limited to patients who did not receive antivirals, who had received booster vaccination, and who had active hematologic malignancy, based on recent treatment with non-glucocorticoid immune-suppressive or antineoplastic drugs.

| Age (years)                                              | Number of Comorbidities |                |                |               |
|----------------------------------------------------------|-------------------------|----------------|----------------|---------------|
|                                                          | 0                       | 1              | 2              | ≥ 3           |
| <b>Omicron B (March 1 – September 30, 2022)</b>          |                         |                |                |               |
| < 60                                                     | 4/35 (11.4%)            | 4/14 (28.6%)   | 2/10 (20.0%)   | 0/1 (0.0%)    |
| 60-69                                                    | 8/37 (21.6%)            | 10/36 (27.8%)  | 6/25 (24.0%)   | 7/11 (63.6%)  |
| 70-79                                                    | 18/111 (16.2%)          | 28/106 (26.4%) | 16/77 (20.8%)  | 22/49 (44.9%) |
| ≥ 80                                                     | 8/33 (24.2%)            | 14/41 (34.1%)  | 17/35 (48.6%)  | 8/22 (36.4%)  |
| <b>Omicron A (December 16, 2021 – February 28, 2022)</b> |                         |                |                |               |
| < 60                                                     | 4/42 (9.5%)             | 3/13 (23.1%)   | 2/10 (20.0%)   | 1/5 (20.0%)   |
| 60-69                                                    | 11/66 (16.7%)           | 5/30 (16.7%)   | 4/27 (14.8%)   | 8/19 (42.1%)  |
| 70-79                                                    | 17/86 (19.8%)           | 18/87 (20.7%)  | 27/69 (39.1%)  | 12/41 (29.3%) |
| ≥ 80                                                     | 9/25 (36.0%)            | 8/20 (40.0%)   | 4/14 (28.6%)   | 14/17 (82.4%) |
| <b>Combined (December 16, 2021 – September 30, 2022)</b> |                         |                |                |               |
| < 60                                                     | 8/77 (10.4%)            | 7/27 (25.9%)   | 4/20 (20.0%)   | 1/6 (16.7%)   |
| 60-69                                                    | 19/103 (18.4%)          | 15/66 (22.7%)  | 10/52 (19.2%)  | 15/30 (50.0%) |
| 70-79                                                    | 35/197 (17.8%)          | 46/193 (23.8%) | 43/146 (29.5%) | 34/90 (37.8%) |
| ≥ 80                                                     | 17/58 (29.3%)           | 22/61 (36.1%)  | 21/49 (42.9%)  | 22/39 (56.4%) |

Comorbidities: Alzheimer's/dementia, chronic kidney disease, chronic obstructive pulmonary disease or bronchiectasis, diabetes, heart failure, peripheral vascular disease

**eTable 14.** Clinical and demographic data for the full cohort of 6122 patients with hematologic malignancies and SARS-CoV-2 infection after vaccination, and the 214 patients who died 2-28 days after diagnosis of infection. Numbers were too small to attempt multivariable analysis. Deaths were not adjudicated by chart review to determine whether they were COVID-19-related.

|                                              | <b>Total in cohort<br/>(N = 6122)</b> | <b>Deaths<br/>(N = 214)</b> | <b>% Died<br/>(3.5%)</b> |
|----------------------------------------------|---------------------------------------|-----------------------------|--------------------------|
| <b>Disease Class</b>                         |                                       |                             |                          |
| AML                                          | 172 (2.8%)                            | 8 (3.7%)                    | 4.7%                     |
| CLL                                          | 1206 (19.7%)                          | 59 (27.6%)                  | 4.9%                     |
| CML                                          | 180 (2.9%)                            | 7 (3.3%)                    | 3.9%                     |
| HL                                           | 157 (2.6%)                            | 3 (1.4%)                    | 1.9%                     |
| MDS                                          | 518 (8.5%)                            | 19 (8.9%)                   | 3.7%                     |
| MPD                                          | 1144 (18.7%)                          | 26 (12.2%)                  | 2.3%                     |
| NHL                                          | 1731 (28.3%)                          | 55 (25.7%)                  | 3.2%                     |
| PC                                           | 1014 (61.6%)                          | 37 (17.3%)                  | 3.6%                     |
| <b>Disease group</b>                         |                                       |                             |                          |
| Lymphoid                                     | 4108 (67.1%)                          | 154 (72.0%)                 | 3.7%                     |
| Myeloid                                      | 2014 (32.9%)                          | 60 (28.0%)                  | 3.0%                     |
| <b>Treatment group</b>                       |                                       |                             |                          |
| Combination that includes both GC and non-GC | 1905 (31.1%)                          | 93 (43.5%)                  | 4.9%                     |
| Glucocorticoids only                         | 1725 (28.2%)                          | 38 (17.8%)                  | 2.2%                     |
| Non-glucocorticoids only                     | 1588 (25.1%)                          | 30 (14.0%)                  | 1.9%                     |
| No medication                                | 904 (14.8%)                           | 53 (24.8%)                  | 5.9%                     |
| <b>Age</b>                                   |                                       |                             |                          |
| Mean (SD)                                    | 70.9 (11.57)                          | 78.3 (8.66)                 |                          |
| <b>Sex</b>                                   |                                       |                             |                          |
| F                                            | 308 (5.0%)                            | 5 (2.3%)                    | 1.6%                     |
| M                                            | 5814 (95.0%)                          | 209 (97.7%)                 | 3.6%                     |
| <b>Period of dominant variant</b>            |                                       |                             |                          |
| Delta                                        | 1102 (18.0%)                          | 65 (30.4%)                  | 5.9%                     |
| Omicron A                                    | 2369 (38.7%)                          | 79 (36.9%)                  | 3.3%                     |
| Omicron B                                    | 2480 (40.5%)                          | 68 (31.8%)                  | 2.7%                     |
| Pre-delta                                    | 171 (2.8%)                            | 2 (0.9%)                    | 1.2%                     |
| <b>Immunity-related</b>                      |                                       |                             |                          |

|                                 | <b>Total in cohort<br/>(N = 6122)</b> | <b>Deaths<br/>(N = 214)</b> | <b>% Died<br/>(3.5%)</b> |
|---------------------------------|---------------------------------------|-----------------------------|--------------------------|
| Boosted                         | 3468 (56.6%)                          | 103 (48.1%)                 | 3.0%                     |
| No boost                        | 2654 (43.4%)                          | 111 (51.9%)                 | 4.2%                     |
| Infection before vaccinated     | 263 (4.3%)                            | 2 (0.9%)                    | 0.8%                     |
| <b>Comorbidities</b>            |                                       |                             |                          |
| Alzheimer's / dementia          | 437 (7.1%)                            | 30 (14.0%)                  | 6.9%                     |
| Chronic kidney disease          | 1857 (13.3%)                          | 89 (41.6%)                  | 4.8%                     |
| COPD / bronchiectasis           | 1128 (18.4%)                          | 54 (25.2%)                  | 4.8%                     |
| Diabetes                        | 2353 (38.4%)                          | 104 (48.6%)                 | 4.4%                     |
| Heart failure                   | 792 (12.9%)                           | 61 (28.5%)                  | 7.7%                     |
| Liver / cirrhosis               | 540 (8.8%)                            | 29 (13.6%)                  | 5.4%                     |
| Mobility impairments            | 127 (2.1%)                            | 3 (1.4%)                    | 2.4%                     |
| MS / transverse myelitis        | 35 (0.6%)                             | 0 (0.0%)                    | 0.0%                     |
| Peripheral vascular disease     | 531 (8.7%)                            | 38 (17.8%)                  | 7.2%                     |
| Pressure / chronic ulcers       | 257 (4.2%)                            | 18 (8.4%)                   | 7.0%                     |
| Schizophrenia / psychosis       | 150 (2.5%)                            | 6 (2.8%)                    | 4.0%                     |
| <b>Comorbidity Score</b>        |                                       |                             |                          |
| Mean (SD)                       | 1.16 (1.19)                           | 1.76 (1.45)                 |                          |
| <b>Treatment for SARS-CoV-2</b> |                                       |                             |                          |
| Oral antiviral                  | 655 (10.7%)                           | 3 (1.4%)                    | 0.5%                     |
| Nirmatrelvir / ritonavir        | 467 (7.6%)                            | 2 (0.9%)                    | 0.4%                     |
| Molnupiravir                    | 189 (3.1%)                            | 1 (0.5%)                    | 0.5%                     |
| MAB                             | 641 (10.5%)                           | 6 (2.8%)                    | 0.9%                     |
| No antiviral                    | 4864 (79.5%)                          | 205 (95.8%)                 | 4.2%                     |

HL = Hodgkin's lymphoma. NHL = non-Hodgkin's lymphoma. CLL = chronic lymphocytic leukemia. PC = plasmacytoid malignancy (myeloma or Waldenstrom's). MPD = myeloproliferative disorder without a diagnosis of MDS or CML. MDS = myelodysplastic syndromes. CML = chronic lymphocytic leukemia. AML = acute myeloblastic leukemia. MAB = monoclonal antibodies. IS = immune-suppressive medication. GC = glucocorticoid. COPD = chronic obstructive pulmonary disease. MS = multiple sclerosis.
