# Supplementary material for: Severe COVID-19 in Vaccinated Adults With Hematologic Cancers in the Veterans Health Administration
Source: PubMed Central journal article supplement (PMC10891464; doi:10.1001/jamanetworkopen.2024.0288), 2024-02-23
Supplement: jamanetwopen-e240288-s002.pdf [file jamanetwopen-e240288-s002.pdf]

## Data Sharing Statement

Anand. Severe COVID-19 in Vaccinated Adults With Hematologic Cancers in the Veterans Health Administration. *JAMA Netw Open*. Published February 23, 2024.

doi:10.1001/jamanetworkopen.2024.0288

### Data

**Data available:** No

### Additional Information

**Explanation for why data not available:** Per VA policy, patient-level data cannot be shared except under very limited circumstances. This statement is included at the end of the manuscript, after the acknowledgments. A data dictionary is provided giving the definitions for the variables used in the study.
